# Supplementary material for: Antioxidant Capacity Changes and Untargeted Metabolite Profile of Broccoli during Lactic Acid Bacteria Fermentation
Source: MDPI journal article supplement (doi:10.3390/fermentation9050474), 2023-05-15
Supplement: s1 [file s1]

**Figure S1.** Visualization of significant differential metabolites. Six comparisons among four groups of samples in each mode. (a–c) are negative ion mode and (d–f) are positive ion mode. Blocks in orange are upregulated metabolites and blocks in blue are downregulated.

**Table S1.** The list of a total of 977 identified metabolites in fermented broccoli samples.

| No. | R <sub>t</sub> (min) | m/z      | Name                                                                                                  | Adduct                | Superclass                       |
|-----|----------------------|----------|-------------------------------------------------------------------------------------------------------|-----------------------|----------------------------------|
| 1   | 0.565                | 308.0894 | L-Glutathione (reduced form)                                                                          | [M+H] <sup>+</sup>    | Organic acids and derivatives    |
| 2   | 0.569                | 259.0215 | alpha-D-Mannose 1-phosphate                                                                           | [M-H] <sup>-</sup>    | Organic oxygen compounds         |
| 3   | 0.572                | 276.1169 | gamma-Glutamylglutamine                                                                               | [M+H] <sup>+</sup>    | Organic acids and derivatives    |
| 4   | 0.574                | 134.044  | 2-Aminobutanedioate;hydron                                                                            | [M+H] <sup>+</sup>    | Organic acids and derivatives    |
| 5   | 0.575                | 147.1108 | Lysine                                                                                                | [M+H] <sup>+</sup>    | Organic acids and derivatives    |
| 6   | 0.579                | 193.0366 | 2-Dehydro-D-gluconic acid                                                                             | [M-H] <sup>-</sup>    | Organic oxygen compounds         |
| 7   | 0.581                | 209.0301 | Galactaric acid                                                                                       | [M-H] <sup>-</sup>    | Organic oxygen compounds         |
| 8   | 0.584                | 102.0549 | 1-Azaniumylcyclopropane-1-carboxylate                                                                 | [M+H] <sup>+</sup>    | Organic acids and derivatives    |
| 9   | 0.593                | 132.0304 | Aspartic acid                                                                                         | [M-H] <sup>-</sup>    | Organic acids and derivatives    |
| 10  | 0.605                | 195.0528 | Gluconic acid                                                                                         | [M-H] <sup>-</sup>    | Organic acids and derivatives    |
| 11  | 0.608                | 135.0296 | Threonic acid                                                                                         | [M-H] <sup>-</sup>    | Organic oxygen compounds         |
| 12  | 0.609                | 146.0459 | Glutamic acid                                                                                         | [M-H] <sup>-</sup>    | Organic acids and derivatives    |
| 13  | 0.61                 | 104.0354 | Serine                                                                                                | [M-H] <sup>-</sup>    | Organic acids and derivatives    |
| 14  | 0.611                | 115.0028 | Hexanoic acid                                                                                         | [M-H] <sup>-</sup>    | Lipids and lipid-like molecules  |
| 15  | 0.613                | 102.0553 | 3-Aminoisobutyrate                                                                                    | [M-H] <sup>-</sup>    | Organic acids and derivatives    |
| 16  | 0.613                | 191.0556 | Quinic acid                                                                                           | [M-H] <sup>-</sup>    | Organic oxygen compounds         |
| 17  | 0.614                | 131.0454 | Asparagine                                                                                            | [M-H] <sup>-</sup>    | Organic acids and derivatives    |
| 18  | 0.616                | 147.075  | Glutamine Analogue, 1                                                                                 | [M+H] <sup>+</sup>    | Organic acids and derivatives    |
| 19  | 0.617                | 145.0623 | Glutamine                                                                                             | [M-H] <sup>-</sup>    | Organic acids and derivatives    |
| 20  | 0.619                | 75.00932 | 2-Oxonioacetate                                                                                       | [M-H] <sup>-</sup>    | Organic acids and derivatives    |
| 21  | 0.62                 | 154.0626 | Histidine                                                                                             | [M-H] <sup>-</sup>    | Organic acids and derivatives    |
| 22  | 0.623                | 203.0515 | Fructose (Generic Ketohexose)                                                                         | [M+Na] <sup>+</sup>   | Organic oxygen compounds         |
| 23  | 0.623                | 227.0759 | Mannitol                                                                                              | [M+FA-H] <sup>-</sup> | Organic oxygen compounds         |
| 24  | 0.623                | 181.0723 | Sorbitol                                                                                              | [M-H] <sup>-</sup>    | Organic oxygen compounds         |
| 25  | 0.624                | 351.1208 | 6a,7,8-Trihydroxy-3-methyl-3,4,5,6,7,12a-hexahydro-2H-benzo[a]anthracene-1,12-dione                   | [M+Na] <sup>+</sup>   | Benzenoids                       |
| 26  | 0.625                | 118.0513 | L-Threonine                                                                                           | [M-H] <sup>-</sup>    | Organic acids and derivatives    |
| 27  | 0.626                | 455.1148 | [3-Hydroxy-1-(4-methoxy-7-oxofuro[3,2-g]chromen-9-yl)oxy-3-methylbutan-2-yl] (E)-2-methylbut-2-enoate | [M+K] <sup>+</sup>    | Phenylpropanoids and polyketides |
| 28  | 0.627                | 173.1044 | Arginine                                                                                              | [M-H] <sup>-</sup>    | Organic acids and derivatives    |
| 29  | 0.629                | 120.0631 | Allo-thr                                                                                              | [M+H] <sup>+</sup>    | Organic acids and derivatives    |
| 30  | 0.633                | 180.0861 | D-Glucosamine                                                                                         | [M+H] <sup>+</sup>    | Organic oxygen compounds         |
| 31  | 0.633                | 69.03308 | Furan                                                                                                 | [M+H] <sup>+</sup>    | Undefined                        |

|    |       |          |                                                                    |                                     |                                         |
|----|-------|----------|--------------------------------------------------------------------|-------------------------------------|-----------------------------------------|
| 32 | 0.634 | 166.051  | L-Methionine sulfoxide                                             | [M+H] <sup>+</sup>                  | Organic acids and derivatives           |
| 33 | 0.636 | 179.0561 | D-Glucose                                                          | [M-H] <sup>-</sup>                  | Organic oxygen compounds                |
| 34 | 0.641 | 162.0752 | O-Acetylhomoserine                                                 | [M+H] <sup>+</sup>                  | Organic acids and derivatives           |
| 35 | 0.641 | 133.0148 | L-Malic acid                                                       | [M-H] <sup>-</sup>                  | Organic acids and derivatives           |
| 36 | 0.643 | 341.1077 | Lactulose                                                          | [M-H] <sup>-</sup>                  | Organic oxygen compounds                |
| 37 | 0.645 | 360.1496 | beta-Gentiobiose                                                   | [M+NH <sub>4</sub> ] <sup>+</sup>   | Organic oxygen compounds                |
| 38 | 0.645 | 138.0545 | Trigonelline HCl                                                   | [M+H] <sup>+</sup>                  | Undefined                               |
| 39 | 0.646 | 165.0741 | 1,5-Anhydro-D-glucitol                                             | [2M+H] <sup>+</sup>                 | Organic oxygen compounds                |
| 40 | 0.646 | 87.00861 | Pyruvic acid                                                       | [M-H] <sup>-</sup>                  | Organic acids and derivatives           |
| 41 | 0.648 | 503.1569 | Raffinose                                                          | [M-H] <sup>-</sup>                  | Organic oxygen compounds                |
| 42 | 0.651 | 114.0561 | Proline                                                            | [M-H] <sup>-</sup>                  | Organic acids and derivatives           |
| 43 | 0.652 | 104.1074 | Choline                                                            | [M] <sup>+</sup>                    | Organic nitrogen compounds              |
| 44 | 0.652 | 355.1048 | Gentiopicroside                                                    | [M-H] <sup>-</sup>                  | Undefined                               |
| 45 | 0.653 | 68.04893 | Pyrrole                                                            | [M+H] <sup>+</sup>                  | Organoheterocyclic compounds            |
| 46 | 0.658 | 322.0431 | Cytidine 3'-monophosphate                                          | [M-H] <sup>-</sup>                  | Organic oxygen compounds                |
| 47 | 0.66  | 307.0321 | 2'-Deoxyuridine 5'-monophosphate                                   | [M-H] <sup>-</sup>                  | Nucleosides, nucleotides, and analogues |
| 48 | 0.66  | 177.0408 | Gulonic acid                                                       | [M-H] <sup>-</sup>                  | Organic acids and derivatives           |
| 49 | 0.663 | 128.0348 | L-Pyroglutamic acid                                                | [M-H] <sup>-</sup>                  | Organic acids and derivatives           |
| 50 | 0.664 | 305.1427 | Nopaline                                                           | [M+H] <sup>+</sup>                  | Organic acids and derivatives           |
| 51 | 0.665 | 304.0345 | Cytidine 2',3'-cyclic phosphate                                    | [M-H] <sup>-</sup>                  | Nucleosides, nucleotides, and analogues |
| 52 | 0.667 | 89.02812 | L-Lactic acid                                                      | [M+FA-H] <sup>-</sup>               | Organic acids and derivatives           |
| 53 | 0.668 | 324.0566 | Cytidine-5'-monophosphate                                          | [M+H] <sup>+</sup>                  | Nucleosides, nucleotides, and analogues |
| 54 | 0.674 | 111.0435 | 2-Acetylfuran                                                      | [M+H-H <sub>2</sub> O] <sup>+</sup> | Undefined                               |
| 55 | 0.676 | 129.0197 | Citraconic acid                                                    | [M-H] <sup>-</sup>                  | Lipids and lipid-like molecules         |
| 56 | 0.682 | 243.0637 | Pseudouridine                                                      | [M-H] <sup>-</sup>                  | Nucleosides, nucleotides, and analogues |
| 57 | 0.685 | 173.0905 | Glycyl-L-proline                                                   | [M+H] <sup>+</sup>                  | Organic acids and derivatives           |
| 58 | 0.69  | 173.0089 | cis-Aconitic acid                                                  | [M-H] <sup>-</sup>                  | Organic acids and derivatives           |
| 59 | 0.703 | 139.0391 | 3,4-Dihydroxybenzaldehyde                                          | [M+H] <sup>+</sup>                  | Organic oxygen compounds                |
| 60 | 0.746 | 130.0859 | Pipecolic acid                                                     | [M+H] <sup>+</sup>                  | Organic acids and derivatives           |
| 61 | 0.748 | 146.0916 | 4-Guanidinobutyric acid                                            | [M+H] <sup>+</sup>                  | Organic acids and derivatives           |
| 62 | 0.757 | 189.1578 | N <sub>6</sub> ,N <sub>6</sub> ,N <sub>6</sub> -Trimethyl-L-lysine | [M+H] <sup>+</sup>                  | Organic acids and derivatives           |
| 63 | 0.758 | 203.1485 | N,N-Dimethylarginine                                               | [M+H] <sup>+</sup>                  | Organic acids and derivatives           |
| 64 | 0.758 | 149.0214 | Phthalic anhydride                                                 | [M+H] <sup>+</sup>                  | Undefined                               |
| 65 | 0.771 | 146.1177 | Acetylcholine                                                      | [M] <sup>+</sup>                    | Organic nitrogen compounds              |
| 66 | 0.787 | 111.0206 | Uracil                                                             | [M-H] <sup>-</sup>                  | Organoheterocyclic compounds            |
| 67 | 0.79  | 242.0773 | Cytidine                                                           | [M-H] <sup>-</sup>                  | Nucleosides, nucleotides, and analogues |

|     |       |          |                                                                                |         |                                         |
|-----|-------|----------|--------------------------------------------------------------------------------|---------|-----------------------------------------|
| 68  | 0.796 | 371.1555 | Arctigenin                                                                     | [M-H]-  | Undefined                               |
| 69  | 0.798 | 187.1096 | L-Ala-L-Val                                                                    | [M-H]-  | Organic acids and derivatives           |
| 70  | 0.804 | 315.0715 | Benzoic acid + 2O, O-Hex                                                       | [M-H]-  | Organic oxygen compounds                |
| 71  | 0.807 | 148.0438 | Methionine                                                                     | [M-H]-  | Organic acids and derivatives           |
| 72  | 0.81  | 117.0199 | Succinic acid                                                                  | [M-H]-  | Organic acids and derivatives           |
| 73  | 0.812 | 161.0446 | Meglutol                                                                       | [M-H]-  | Lipids and lipid-like molecules         |
| 74  | 0.813 | 399.1409 | S-Adenosylmethionine                                                           | [M+H]+  | Nucleosides, nucleotides, and analogues |
| 75  | 0.816 | 180.0664 | Tyrosine                                                                       | [M-H]-  | Organic acids and derivatives           |
| 76  | 0.821 | 243.0633 | Uridine                                                                        | [M-H]-  | Nucleosides, nucleotides, and analogues |
| 77  | 0.826 | 309.1187 | gamma-Glutamyltyrosine                                                         | [M-H]-  | Organic acids and derivatives           |
| 78  | 0.827 | 152.0343 | Mesalamine                                                                     | [M-H]-  | Benzenoids                              |
| 79  | 0.831 | 175.1185 | Glycylvaline                                                                   | [M+H]+  | Organic acids and derivatives           |
| 80  | 0.831 | 237.0883 | Gly-Tyr                                                                        | [M-H]-  | Organic acids and derivatives           |
| 81  | 0.848 | 322.1391 | Codeine                                                                        | [M+Na]+ | Alkaloids and derivatives               |
| 82  | 0.862 | 132.1015 | DL-Isoleucine                                                                  | [M+H]+  | Organic acids and derivatives           |
| 83  | 0.869 | 130.0876 | l-Isoleucine                                                                   | [M-H]-  | Organic acids and derivatives           |
| 84  | 0.871 | 124.0381 | Hydron;pyridine-3-carboxylate                                                  | [M+H]+  | Organoheterocyclic compounds            |
| 85  | 0.896 | 202.1785 | 4-Hydroxy-1-(2-hydroxyethyl)-2,2,6,6-tetramethylpiperidine                     | [M+H]+  | Organoheterocyclic compounds            |
| 86  | 0.911 | 228.0856 | 2'-Deoxycytidine                                                               | [M+H]+  | Nucleosides, nucleotides, and analogues |
| 87  | 0.943 | 112.0497 | Cytosine                                                                       | [M+H]+  | Organoheterocyclic compounds            |
| 88  | 0.959 | 188.1755 | N8-Acetylspermidine                                                            | [M+H]+  | Organic acids and derivatives           |
| 89  | 1.005 | 201.123  | Ala-Ile                                                                        | [M-H]-  | Organic acids and derivatives           |
| 90  | 1.016 | 282.1197 | N6-Methyladenosine                                                             | [M+H]+  | Nucleosides, nucleotides, and analogues |
| 91  | 1.066 | 365.1009 | Sucrose                                                                        | [M+Na]+ | Organic oxygen compounds                |
| 92  | 1.123 | 366.0781 | (2S)-7-Hydroxy-3-oxo-3,4-dihydro-2H-1,4-benzoxazin-2-yl beta-D-glucopyranoside | [M+Na]+ | Organic oxygen compounds                |
| 93  | 1.132 | 154.0833 | Dopamine                                                                       | [M+H]+  | Benzenoids                              |
| 94  | 1.166 | 166.0505 | Pyridoxal                                                                      | [M-H]-  | Organoheterocyclic compounds            |
| 95  | 1.169 | 282.0824 | Guanosine                                                                      | [M-H]-  | Nucleosides, nucleotides, and analogues |
| 96  | 1.228 | 126.0643 | 5-Methylcytosine                                                               | [M+H]+  | Organoheterocyclic compounds            |
| 97  | 1.246 | 298.1131 | 2-Methylguanosine                                                              | [M+H]+  | Nucleosides, nucleotides, and analogues |
| 98  | 1.246 | 150.0754 | 3-Methyladenine                                                                | [M+H]+  | Organoheterocyclic compounds            |
| 99  | 1.255 | 138.0543 | Trigonelline                                                                   | [M+H]+  | Alkaloids and derivatives               |
| 100 | 1.255 | 119.0336 | Methylmalonic acid                                                             | [M+H]+  | Organic acids and derivatives           |
| 101 | 1.26  | 170.0794 | Pyridoxine                                                                     | [M+H]+  | Organoheterocyclic compounds            |
| 102 | 1.263 | 344.0375 | Cyclic guanosine monophosphate                                                 | [M-H]-  | Nucleosides, nucleotides, and analogues |

|     |       |          |                                                                                                                                                  |                     |                                         |
|-----|-------|----------|--------------------------------------------------------------------------------------------------------------------------------------------------|---------------------|-----------------------------------------|
| 103 | 1.267 | 291.1416 | Trimethoprim                                                                                                                                     | [M+H] <sup>+</sup>  | Benzenoids                              |
| 104 | 1.276 | 118.0844 | Betaine                                                                                                                                          | [M+H] <sup>+</sup>  | Organic acids and derivatives           |
| 105 | 1.291 | 145.0505 | Monomethyl glutaric acid                                                                                                                         | [M-H] <sup>-</sup>  | Lipids and lipid-like molecules         |
| 106 | 1.293 | 203.139  | 2-[(2-Ammonio-4-methylpentanoyl)amino]propanoate                                                                                                 | [M+H] <sup>+</sup>  | Organic acids and derivatives           |
| 107 | 1.295 | 137.0237 | 4-Hydroxybenzoic acid                                                                                                                            | [M-H] <sup>-</sup>  | Benzenoids                              |
| 108 | 1.364 | 127.0498 | Thymine                                                                                                                                          | [M+H] <sup>+</sup>  | Organoheterocyclic compounds            |
| 109 | 1.375 | 217.1547 | H-DL-Val-DL-Val-OH                                                                                                                               | [M+H] <sup>+</sup>  | Organic acids and derivatives           |
| 110 | 1.402 | 158.0797 | 1-Acetylproline                                                                                                                                  | [M+H] <sup>+</sup>  | Organic acids and derivatives           |
| 111 | 1.421 | 312.0677 | 2-(1-Chlorocyclopropyl)-1-(2-chlorophenyl)-3-(1H-1,2,4-triazol-1-yl)propan-2-ol                                                                  | [M+H] <sup>+</sup>  | Benzenoids                              |
| 112 | 1.43  | 488.2412 | Methyl (2E,8E)-9-[3a-hydroxy-6,7-dimethyl-1-(2-methylpropyl)-3-oxo-2,4,7,7a-tetrahydro-1H-isoindol-4-yl]-4,5-dihydroxy-8-methylnona-2,8-dienoate | [M+K] <sup>+</sup>  | Lipids and lipid-like molecules         |
| 113 | 1.462 | 258.1071 | 2'-O-Methylcytidine                                                                                                                              | [M+H] <sup>+</sup>  | Nucleosides, nucleotides, and analogues |
| 114 | 1.462 | 112.0498 | Pyrrole-2-carboxylic acid                                                                                                                        | [M+H] <sup>+</sup>  | Organoheterocyclic compounds            |
| 115 | 1.462 | 130.0866 | Leucine                                                                                                                                          | [M-H] <sup>-</sup>  | Organic acids and derivatives           |
| 116 | 1.463 | 131.034  | Methylsuccinic acid                                                                                                                              | [M-H] <sup>-</sup>  | Lipids and lipid-like molecules         |
| 117 | 1.468 | 150.0419 | Guanine                                                                                                                                          | [M-H] <sup>-</sup>  | Organoheterocyclic compounds            |
| 118 | 1.471 | 332.1328 | Pyridoxine + O-Hex                                                                                                                               | [M+H] <sup>+</sup>  | Organoheterocyclic compounds            |
| 119 | 1.473 | 138.0556 | 4-Nitrophenol                                                                                                                                    | [M-H] <sup>-</sup>  | Benzenoids                              |
| 120 | 1.473 | 176.0377 | N-Formylmethionine                                                                                                                               | [M-H] <sup>-</sup>  | Organic acids and derivatives           |
| 121 | 1.526 | 155.0804 | Cyclo-prolylglycine                                                                                                                              | [M+H] <sup>+</sup>  | Organic acids and derivatives           |
| 122 | 1.526 | 381.1353 | Fumiquinazoline F                                                                                                                                | [M+Na] <sup>+</sup> | Organoheterocyclic compounds            |
| 123 | 1.535 | 123.0543 | Nicotinamide                                                                                                                                     | [M+H] <sup>+</sup>  | Organoheterocyclic compounds            |
| 124 | 1.574 | 80.04843 | Pyridine                                                                                                                                         | [M+H] <sup>+</sup>  | Organoheterocyclic compounds            |
| 125 | 1.576 | 233.1484 | Threonylleucine                                                                                                                                  | [M+H] <sup>+</sup>  | Organic acids and derivatives           |
| 126 | 1.604 | 261.1433 | h-gamma-Glu-leu-oh                                                                                                                               | [M+H] <sup>+</sup>  | Organic acids and derivatives           |
| 127 | 1.635 | 266.0904 | 2'-Deoxyguanosine                                                                                                                                | [M-H] <sup>-</sup>  | Nucleosides, nucleotides, and analogues |
| 128 | 1.651 | 131.1287 | Agmatine                                                                                                                                         | [M+H] <sup>+</sup>  | Organic nitrogen compounds              |
| 129 | 1.666 | 163.0397 | 3-Hydroxycinnamic acid                                                                                                                           | [M-H] <sup>-</sup>  | Phenylpropanoids and polyketides        |
| 130 | 1.671 | 117.0549 | 3-Hydroxypentanoic acid                                                                                                                          | [M-H] <sup>-</sup>  | Lipids and lipid-like molecules         |
| 131 | 1.689 | 295.1279 | H-Asp-Phe-OMe                                                                                                                                    | [M+H] <sup>+</sup>  | Organic acids and derivatives           |
| 132 | 1.711 | 203.1391 | Ala-Leu                                                                                                                                          | [M+H] <sup>+</sup>  | Organic acids and derivatives           |
| 133 | 1.715 | 187.1087 | Gly-Leu                                                                                                                                          | [M-H] <sup>-</sup>  | Organic acids and derivatives           |
| 134 | 1.717 | 328.0457 | Adenosine 2',3'-cyclic phosphate                                                                                                                 | [M-H] <sup>-</sup>  | Nucleosides, nucleotides, and analogues |
| 135 | 1.759 | 308.1553 | Tebuconazole                                                                                                                                     | [M+H] <sup>+</sup>  | Benzenoids                              |
| 136 | 1.772 | 191.0181 | Hydron;2-hydroxypropane-1,2,3-tricarboxylate                                                                                                     | [M-H] <sup>-</sup>  | Organic acids and derivatives           |
| 137 | 1.774 | 116.0695 | Pyrrolidin-1-ium-2-carboxylate                                                                                                                   | [M+H] <sup>+</sup>  | Organic acids and derivatives           |

|     |       |          |                                                                                                         |         |                                         |
|-----|-------|----------|---------------------------------------------------------------------------------------------------------|---------|-----------------------------------------|
| 138 | 1.779 | 367.0968 | (E)-3-(3,4-Dihydroxyphenyl)acrylic acid (1R,2R,3R)-2,3,5-trihydroxy-5-(methoxycarbonyl)cyclohexyl ester | [M-H]-  | Organic oxygen compounds                |
| 139 | 1.78  | 353.085  | N(4)-Acetylsulfadimethoxine                                                                             | [M+H]+  | Benzenoids                              |
| 140 | 1.787 | 138.0529 | Anthranilic acid                                                                                        | [M+H]+  | Benzenoids                              |
| 141 | 1.806 | 296.1007 | 2'-O-Methylguanosine                                                                                    | [M-H]-  | Nucleosides, nucleotides, and analogues |
| 142 | 1.822 | 129.0189 | Hydron;2-methylidenebutanedioate                                                                        | [M-H]-  | Lipids and lipid-like molecules         |
| 143 | 1.822 | 343.1282 | Tyr-Tyr                                                                                                 | [M-H]-  | Organic acids and derivatives           |
| 144 | 1.833 | 181.0506 | 2-Hydroxy-3-(4-hydroxyphenyl)propanoic acid                                                             | [M-H]-  | Phenylpropanoids and polyketides        |
| 145 | 1.852 | 329.2177 | 17alpha-Hydroxypregn-4-ene-3,20-dione                                                                   | [M-H]-  | Lipids and lipid-like molecules         |
| 146 | 1.877 | 210.0484 | Dimethirimol                                                                                            | [M+H]+  | Undefined                               |
| 147 | 1.877 | 310.0027 | 5-Hydroxydiclofenac                                                                                     | [M-H]-  | Benzenoids                              |
| 148 | 1.878 | 149.0578 | p-Coumaraldehyde                                                                                        | [M+H]+  | Phenylpropanoids and polyketides        |
| 149 | 1.888 | 244.13   | Leu-Gly-Gly                                                                                             | [M-H]-  | Organic acids and derivatives           |
| 150 | 1.892 | 182.0449 | 4-Pyridoxic acid                                                                                        | [M-H]-  | Organoheterocyclic compounds            |
| 151 | 1.894 | 337.1524 | alpha-Cyclopiazonic acid                                                                                | [M+H]+  | Organoheterocyclic compounds            |
| 152 | 1.914 | 218.1029 | Calcium pantothenate                                                                                    | [M-H]-  | Undefined                               |
| 153 | 1.925 | 353.0873 | Neochlorogenic acid                                                                                     | [M-H]-  | Organic oxygen compounds                |
| 154 | 1.927 | 355.0989 | Cryptochlorogenic acid                                                                                  | [M+H]+  | Organic oxygen compounds                |
| 155 | 1.932 | 163.038  | 4-Hydroxycoumarin                                                                                       | [M+H]+  | Phenylpropanoids and polyketides        |
| 156 | 1.936 | 364.1209 | 9-Aminocamptothecin                                                                                     | [M+H]+  | Undefined                               |
| 157 | 1.947 | 180.0862 | D-(+)-Glucosamine                                                                                       | [M+H]+  | Undefined                               |
| 158 | 1.956 | 296.0986 | 3'-O-Methylguanosine                                                                                    | [M-H]-  | Nucleosides, nucleotides, and analogues |
| 159 | 1.964 | 137.0452 | Hypoxanthine                                                                                            | [M+H]+  | Organoheterocyclic compounds            |
| 160 | 1.979 | 237.1232 | Carbetamide                                                                                             | [M+H]+  | Undefined                               |
| 161 | 1.981 | 285.1559 | L-Ornithine                                                                                             | [M-H]-  | Organic acids and derivatives           |
| 162 | 1.99  | 225.0742 | 2-(2-Acetyl-3-hydroxy-5-methoxyphenyl)acetic acid                                                       | [M+H]+  | Organic oxygen compounds                |
| 163 | 1.992 | 183.0642 | Syringaldehyde                                                                                          | [M+H]+  | Benzenoids                              |
| 164 | 2.018 | 312.1532 | Leonurine                                                                                               | [M+H]+  | Undefined                               |
| 165 | 2.026 | 302.11   | Flutriafol                                                                                              | [M+H]+  | Benzenoids                              |
| 166 | 2.031 | 220.1184 | Pantothenic acid                                                                                        | [M+H]+  | Organic acids and derivatives           |
| 167 | 2.032 | 242.0984 | D-Pantothenic acid                                                                                      | [M+Na]+ | Organic acids and derivatives           |
| 168 | 2.048 | 279.0989 | L-Aspartyl-L-phenylalanine                                                                              | [M-H]-  | Organic acids and derivatives           |
| 169 | 2.064 | 190.054  | N-Acetyl-DL-methionine                                                                                  | [M-H]-  | Organic acids and derivatives           |
| 170 | 2.068 | 164.0725 | Phenylalanine                                                                                           | [M-H]-  | Organic acids and derivatives           |
| 171 | 2.069 | 122.0584 | Benzamide                                                                                               | [M+H]+  | Benzenoids                              |
| 172 | 2.079 | 268.1025 | 2-(6-Aminopurin-9-yl)-5-(hydroxymethyl)oxolane-3,4-diol                                                 | [M+H]+  | Nucleosides, nucleotides, and analogues |

|     |       |          |                                                                                                                                           |                                     |                                         |
|-----|-------|----------|-------------------------------------------------------------------------------------------------------------------------------------------|-------------------------------------|-----------------------------------------|
| 173 | 2.084 | 546.2625 | Homoharringtonine                                                                                                                         | [M+H] <sup>+</sup>                  | Undefined                               |
| 174 | 2.084 | 353.0876 | 3-[3-(3,4-Dihydroxyphenyl)prop-2-enoyloxy]-1,4,5-trihydroxycyclohexane-1-carboxylic acid                                                  | [M-H] <sup>-</sup>                  | Organic oxygen compounds                |
| 175 | 2.085 | 257.0768 | 2'-O-Methyluridine                                                                                                                        | [M-H] <sup>-</sup>                  | Nucleosides, nucleotides, and analogues |
| 176 | 2.089 | 304.1281 | Imazamox                                                                                                                                  | [M-H] <sup>-</sup>                  | Lipids and lipid-like molecules         |
| 177 | 2.098 | 231.1706 | H-DL-xille-DL-Val-OH                                                                                                                      | [M+H] <sup>+</sup>                  | Organic acids and derivatives           |
| 178 | 2.118 | 262.0909 | Flumequine                                                                                                                                | [M+H] <sup>+</sup>                  | Organoheterocyclic compounds            |
| 179 | 2.13  | 659.3348 | (2E,6E,10E)-14-[[2-O-(beta-D-Glucopyranosyl)-beta-D-glucopyranosyl]oxy]-4-hydroxy-2,6,10,14-tetramethyl-2,6,10,15-hexadecatetraenoic acid | [M-H] <sup>-</sup>                  | Lipids and lipid-like molecules         |
| 180 | 2.137 | 116.0715 | Valine                                                                                                                                    | [M-H] <sup>-</sup>                  | Organic acids and derivatives           |
| 181 | 2.142 | 351.106  | 1-(4-Hydroxyphenyl)-3-[(2R,3R,4S,5S,6R)-3,4,5-trihydroxy-6-(hydroxymethyl)oxan-2-yl]oxypropan-1-one                                       | [M+Na] <sup>+</sup>                 | Lipids and lipid-like molecules         |
| 182 | 2.16  | 448.2238 | Aspergamid B                                                                                                                              | [M+H] <sup>+</sup>                  | Organoheterocyclic compounds            |
| 183 | 2.162 | 317.1084 | (1E,4E)-1,5-Bis(4-methoxyphenyl)penta-1,4-dien-3-one                                                                                      | [M+Na] <sup>+</sup>                 | Benzenoids                              |
| 184 | 2.171 | 413.2003 | Gardneramine                                                                                                                              | [M+H] <sup>+</sup>                  | Organoheterocyclic compounds            |
| 185 | 2.173 | 252.1092 | Cordycepin                                                                                                                                | [M+H] <sup>+</sup>                  | Nucleosides, nucleotides, and analogues |
| 186 | 2.182 | 384.1687 | Prazosin                                                                                                                                  | [M+H] <sup>+</sup>                  | Organoheterocyclic compounds            |
| 187 | 2.195 | 235.1092 | Alanylphenylalanine                                                                                                                       | [M-H] <sup>-</sup>                  | Organic acids and derivatives           |
| 188 | 2.247 | 299.0758 | Salicylic acid glucoside                                                                                                                  | [M-H] <sup>-</sup>                  | Organic oxygen compounds                |
| 189 | 2.261 | 259.1294 | gamma-Glu-leu                                                                                                                             | [M-H] <sup>-</sup>                  | Organic acids and derivatives           |
| 190 | 2.261 | 353.0906 | 1-Caffeoylquinic acid                                                                                                                     | [M-H] <sup>-</sup>                  | Organic oxygen compounds                |
| 191 | 2.29  | 342.1589 | Naltrexone                                                                                                                                | [M+H] <sup>+</sup>                  | Benzenoids                              |
| 192 | 2.296 | 133.9983 | Acetanilide                                                                                                                               | [M-H] <sup>-</sup>                  | Benzenoids                              |
| 193 | 2.309 | 134.0465 | Adenine                                                                                                                                   | [M-H] <sup>-</sup>                  | Organoheterocyclic compounds            |
| 194 | 2.313 | 118.004  | L-Allothreonine                                                                                                                           | [M-H] <sup>-</sup>                  | Organic acids and derivatives           |
| 195 | 2.33  | 352.182  | Retrorsine                                                                                                                                | [M+H] <sup>+</sup>                  | Phenylpropanoids and polyketides        |
| 196 | 2.338 | 215.0814 | 3-Ethyl-4-(methoxyamino)-2,5-dioximidazolidine-4-carboxamide                                                                              | [M-H] <sup>-</sup>                  | Organoheterocyclic compounds            |
| 197 | 2.342 | 295.1256 | Glutamylphenylalanine                                                                                                                     | [M+H] <sup>+</sup>                  | Organic acids and derivatives           |
| 198 | 2.354 | 337.0877 | Cirsimaritin                                                                                                                              | [M+Na] <sup>+</sup>                 | Phenylpropanoids and polyketides        |
| 199 | 2.355 | 203.0828 | Tryptophan                                                                                                                                | [M-H] <sup>-</sup>                  | Organoheterocyclic compounds            |
| 200 | 2.357 | 310.1725 | Fluperlapine                                                                                                                              | [M+H] <sup>+</sup>                  | Organoheterocyclic compounds            |
| 201 | 2.36  | 132.0785 | 2-Methylindole                                                                                                                            | [M+H] <sup>+</sup>                  | Organoheterocyclic compounds            |
| 202 | 2.36  | 144.0798 | Tryptophol                                                                                                                                | [M+H-H <sub>2</sub> O] <sup>+</sup> | Organoheterocyclic compounds            |
| 203 | 2.362 | 315.0921 | Pantoyl lactone glucoside                                                                                                                 | [M+Na] <sup>+</sup>                 | Lipids and lipid-like molecules         |
| 204 | 2.368 | 118.0633 | Norvaline                                                                                                                                 | [M+H] <sup>+</sup>                  | Organic acids and derivatives           |
| 205 | 2.434 | 284.1102 | Crotonoside                                                                                                                               | [M+H] <sup>+</sup>                  | Nucleosides, nucleotides, and analogues |

|     |       |          |                                                                                                                                               |                     |                                         |
|-----|-------|----------|-----------------------------------------------------------------------------------------------------------------------------------------------|---------------------|-----------------------------------------|
| 206 | 2.458 | 468.2889 | Delsoline                                                                                                                                     | [M+H] <sup>+</sup>  | Lipids and lipid-like molecules         |
| 207 | 2.469 | 433.1441 | Bruceine D                                                                                                                                    | [M+Na] <sup>+</sup> | Lipids and lipid-like molecules         |
| 208 | 2.476 | 254.1249 | Penciclovir                                                                                                                                   | [M+H] <sup>+</sup>  | Organoheterocyclic compounds            |
| 209 | 2.478 | 178.1212 | Phenmetrazine                                                                                                                                 | [M+H] <sup>+</sup>  | Organoheterocyclic compounds            |
| 210 | 2.483 | 261.13   | Diaveridine                                                                                                                                   | [M+H] <sup>+</sup>  | Benzenoids                              |
| 211 | 2.485 | 151.0398 | Benzoylformic acid                                                                                                                            | [M-H] <sup>-</sup>  | Benzenoids                              |
| 212 | 2.496 | 137.0235 | Salicylic acid                                                                                                                                | [M-H] <sup>-</sup>  | Benzenoids                              |
| 213 | 2.498 | 743.2994 | Ritonavir                                                                                                                                     | [M+Na] <sup>+</sup> | Organic acids and derivatives           |
| 214 | 2.527 | 310.1146 | N,N-Dimethylguanosine                                                                                                                         | [M-H] <sup>-</sup>  | Nucleosides, nucleotides, and analogues |
| 215 | 2.532 | 282.1201 | 2'-O-Methyladenosine                                                                                                                          | [M+H] <sup>+</sup>  | Nucleosides, nucleotides, and analogues |
| 216 | 2.54  | 135.0448 | Phenylacetic acid                                                                                                                             | [M-H] <sup>-</sup>  | Benzenoids                              |
| 217 | 2.547 | 337.0922 | 3-p-Coumaroylquinic acid                                                                                                                      | [M-H] <sup>-</sup>  | Organic oxygen compounds                |
| 218 | 2.548 | 453.1328 | Polygalatenoside A                                                                                                                            | [M+Na] <sup>+</sup> | Organic oxygen compounds                |
| 219 | 2.551 | 163.0402 | 4-Hydroxycinnamic acid                                                                                                                        | [M-H] <sup>-</sup>  | Phenylpropanoids and polyketides        |
| 220 | 2.553 | 413.1442 | 1-[4-[2-(7-Methoxy-1,3-benzodioxol-5-yl)ethyl]phenoxy]-3-methylbutane-2,3-diol                                                                | [M+K] <sup>+</sup>  | Phenylpropanoids and polyketides        |
| 221 | 2.561 | 147.0431 | Coumarin                                                                                                                                      | [M+H] <sup>+</sup>  | Phenylpropanoids and polyketides        |
| 222 | 2.565 | 563.1521 | 8-[3,4-Dihydroxy-5-(hydroxymethyl)oxolan-2-yl]-5,7-dihydroxy-2-(4-hydroxyphenyl)-6-[3,4,5-trihydroxy-6-(hydroxymethyl)oxan-2-yl]chromen-4-one | [M-H] <sup>-</sup>  | Undefined                               |
| 223 | 2.567 | 179.035  | Caffeic acid                                                                                                                                  | [M-H] <sup>-</sup>  | Phenylpropanoids and polyketides        |
| 224 | 2.594 | 353.0873 | 4-Caffeoylquinic acid;4-O-Caffeoylquinic acid                                                                                                 | [M-H] <sup>-</sup>  | Organic oxygen compounds                |
| 225 | 2.606 | 195.0639 | 4-Formyl-2-methoxyphenyl acetate                                                                                                              | [M+H] <sup>+</sup>  | Benzenoids                              |
| 226 | 2.625 | 188.035  | Kynurenic acid                                                                                                                                | [M-H] <sup>-</sup>  | Organoheterocyclic compounds            |
| 227 | 2.647 | 122.0956 | Phenethylamine                                                                                                                                | [M+H] <sup>+</sup>  | Benzenoids                              |
| 228 | 2.647 | 105.0698 | 3-Cyanopyridine                                                                                                                               | [M+H] <sup>+</sup>  | Organoheterocyclic compounds            |
| 229 | 2.653 | 339.0717 | Esculin                                                                                                                                       | [M-H] <sup>-</sup>  | Phenylpropanoids and polyketides        |
| 230 | 2.654 | 144.0441 | 4-Hydroxyquinoline                                                                                                                            | [M-H] <sup>-</sup>  | Organoheterocyclic compounds            |
| 231 | 2.688 | 413.1418 | N6-Carbamoyl-L-threonyladenosine                                                                                                              | [M+H] <sup>+</sup>  | Nucleosides, nucleotides, and analogues |
| 232 | 2.69  | 367.1017 | 3-Feruloylquinic acids                                                                                                                        | [M-H] <sup>-</sup>  | Undefined                               |
| 233 | 2.714 | 543.3115 | Puberanidine                                                                                                                                  | [M+H] <sup>+</sup>  | Lipids and lipid-like molecules         |
| 234 | 2.762 | 229.1543 | 1-(2-Ammonio-4-methylpentanoyl)pyrrolidine-2-carboxylate                                                                                      | [M+H] <sup>+</sup>  | Organic acids and derivatives           |
| 235 | 2.822 | 271.0827 | Arbutin                                                                                                                                       | [M-H] <sup>-</sup>  | Undefined                               |
| 236 | 2.836 | 282.1197 | 1-Methyladenosine                                                                                                                             | [M+H] <sup>+</sup>  | Nucleosides, nucleotides, and analogues |
| 237 | 2.86  | 328.0761 | Fluazifop                                                                                                                                     | [M+H] <sup>+</sup>  | Benzenoids                              |
| 238 | 2.863 | 367.1018 | 5-O-Feruloylquinic acid                                                                                                                       | [M-H] <sup>-</sup>  | Organic oxygen compounds                |

|     |       |          |                                                                                                                                                                                                                                                      |                     |                                           |
|-----|-------|----------|------------------------------------------------------------------------------------------------------------------------------------------------------------------------------------------------------------------------------------------------------|---------------------|-------------------------------------------|
| 239 | 2.864 | 431.1287 | Nodakenin                                                                                                                                                                                                                                            | [M+Na] <sup>+</sup> | Phenylpropanoids and polyketides          |
| 240 | 2.871 | 447.0926 | Cyanidin 3-O-galactoside                                                                                                                                                                                                                             | [M-2H] <sup>-</sup> | Phenylpropanoids and polyketides          |
| 241 | 2.875 | 193.0489 | 3-(4-Hydroxy-3-methoxyphenyl)-2-propenoic acid                                                                                                                                                                                                       | [M-H] <sup>-</sup>  | Phenylpropanoids and polyketides          |
| 242 | 2.898 | 641.322  | Steviolbioside                                                                                                                                                                                                                                       | [M-H] <sup>-</sup>  | Undefined                                 |
| 243 | 2.906 | 355.1011 | Staphylin                                                                                                                                                                                                                                            | [M+H] <sup>+</sup>  | Organic oxygen compounds                  |
| 244 | 2.907 | 639.1675 | 3-[(2S,3R,4S,5R,6R)-3-[(2S,3S,4R,5R,6S)-3,5-Dihydroxy-4-methoxy-6-methyloxan-2-yl]oxy-4,5-dihydroxy-6-methyloxan-2-yl]oxy-8-hydroxy-15-methyl-11,18-dioxapentacyclo[10.6.2.02,7.09,19.016,20]icosa-1(19),2(7),3,5,8,12(20),13,15-octaene-10,17-dione | [M-H] <sup>-</sup>  | Organoheterocyclic compounds              |
| 245 | 2.921 | 241.1206 | Pyroglutamylisoleucine                                                                                                                                                                                                                               | [M-H] <sup>-</sup>  | Organic acids and derivatives             |
| 246 | 2.924 | 163.0403 | 2-Hydroxycinnamic acid                                                                                                                                                                                                                               | [M-H] <sup>-</sup>  | Phenylpropanoids and polyketides          |
| 247 | 2.94  | 589.2525 | 3-[[6-[[1,4a-Dimethyl-6-methylidene-5-[2-(5-oxo-2H-furan-4-yl)ethyl]-3,4,5,7,8,8a-hexahydro-2H-naphthalen-1-yl]methoxy]-3,4,5-trihydroxyoxan-2-yl]methoxy]-3-oxopropanoic acid                                                                       | [M+Na] <sup>+</sup> | Lipids and lipid-like molecules           |
| 248 | 2.944 | 385.1122 | Sinapoylhexoside                                                                                                                                                                                                                                     | [M-H] <sup>-</sup>  | Phenylpropanoids and polyketides          |
| 249 | 2.952 | 381.0924 | (7E,13E)-9,15-Dihydroxy-4,10,16-trimethyl-1,5,11-trioxacyclohexadeca-7,13-diene-2,6,12-trione                                                                                                                                                        | [M+K] <sup>+</sup>  | Phenylpropanoids and polyketides          |
| 250 | 2.955 | 167.0345 | Vanillic acid                                                                                                                                                                                                                                        | [M-H] <sup>-</sup>  | Benzenoids                                |
| 251 | 2.957 | 245.1848 | H-DL-Leu-DL-Leu-OH                                                                                                                                                                                                                                   | [M+H] <sup>+</sup>  | Organic acids and derivatives             |
| 252 | 2.963 | 114.091  | 2-Imino-1-methylimidazolidin-4-one                                                                                                                                                                                                                   | [M+H] <sup>+</sup>  | Organic acids and derivatives             |
| 253 | 2.966 | 165.019  | Phthalic acid                                                                                                                                                                                                                                        | [M-H] <sup>-</sup>  | Benzenoids                                |
| 254 | 2.979 | 179.0362 | Aspirin                                                                                                                                                                                                                                              | [M-H] <sup>-</sup>  | Benzenoids                                |
| 255 | 3.008 | 537.194  | 2-[4-[4-[Hydroxy-(4-hydroxy-3-methoxyphenyl)methyl]-3-(hydroxymethyl)oxolan-2-yl]-2-methoxyphenoxy]-6-(hydroxymethyl)oxane-3,4,5-triol                                                                                                               | [M-H] <sup>-</sup>  | Lignans, neolignans and related compounds |
| 256 | 3.01  | 561.1926 | 3-Hydroxy-1-(3-hydroxy-4-methoxyphenyl)-2-{4-[(1E)-3-hydroxy-1-propen-1-yl]-2-methoxyphenoxy}propyl beta-D-glucopyranoside                                                                                                                           | [M+Na] <sup>+</sup> | Organic oxygen compounds                  |
| 257 | 3.011 | 418.2258 | Protostemonine                                                                                                                                                                                                                                       | [M+H] <sup>+</sup>  | Undefined                                 |
| 258 | 3.017 | 131.0711 | 2-Hydroxy-4-methylvaleric acid                                                                                                                                                                                                                       | [M-H] <sup>-</sup>  | Lipids and lipid-like molecules           |
| 259 | 3.025 | 191.035  | Isoscapoletin                                                                                                                                                                                                                                        | [M-H] <sup>-</sup>  | Undefined                                 |
| 260 | 3.026 | 399.0926 | Scopolin                                                                                                                                                                                                                                             | [M-H] <sup>-</sup>  | Phenylpropanoids and polyketides          |
| 261 | 3.043 | 517.1546 | Sibiricose A5                                                                                                                                                                                                                                        | [M-H] <sup>-</sup>  | Phenylpropanoids and polyketides          |
| 262 | 3.057 | 483.1459 | Paeonolide                                                                                                                                                                                                                                           | [M+H] <sup>+</sup>  | Undefined                                 |
| 263 | 3.078 | 547.1634 | [(2R,3S,4S,5R,6R)-6-[(2S,3S,4S,5R)-3,4-Dihydroxy-2,5-bis(hydroxymethyl)oxolan-2-yl]oxy-3,4,5-trihydroxyoxan-2-yl]methyl (E)-3-(4-hydroxy-3,5-dimethoxyphenyl)prop-2-enoate                                                                           | [M-H] <sup>-</sup>  | Phenylpropanoids and polyketides          |

|     |       |          |                                                                                                     |                                   |                                  |
|-----|-------|----------|-----------------------------------------------------------------------------------------------------|-----------------------------------|----------------------------------|
| 264 | 3.095 | 265.1104 | Thiamine                                                                                            | [M] <sup>+</sup>                  | Organoheterocyclic compounds     |
| 265 | 3.114 | 411.1243 | Phenyl 6-O-[(2R,3R,4R)-3,4-dihydroxy-4-(hydroxymethyl)tetrahydro-2-furanyl]-beta-D-glucopyranoside  | [M+Na] <sup>+</sup>               | Organic oxygen compounds         |
| 266 | 3.115 | 159.065  | 3-Methyladipic acid                                                                                 | [M-H] <sup>-</sup>                | Lipids and lipid-like molecules  |
| 267 | 3.121 | 377.1239 | Fusarenone X                                                                                        | [M+Na] <sup>+</sup>               | Lipids and lipid-like molecules  |
| 268 | 3.122 | 85.06549 | 3-Methyl-3-buten-2-one                                                                              | [M-H] <sup>-</sup>                | Undefined                        |
| 269 | 3.148 | 697.3439 | Cyanidin-3-(6"-malonylglucoside)                                                                    | [M+NH <sub>4</sub> ] <sup>+</sup> | Undefined                        |
| 270 | 3.162 | 149.0232 | 2-Carboxybenzaldehyde                                                                               | [M-H] <sup>-</sup>                | Benzenoids                       |
| 271 | 3.165 | 177.0534 | 7-Methoxycoumarin                                                                                   | [M+H] <sup>+</sup>                | Phenylpropanoids and polyketides |
| 272 | 3.172 | 265.1538 | H-DL-Val-DL-Phe-OH                                                                                  | [M+H] <sup>+</sup>                | Organic acids and derivatives    |
| 273 | 3.175 | 477.0618 | 1-Methoxyindol-3-ylmethyl glucosinolate                                                             | [M-H] <sup>-</sup>                | Undefined                        |
| 274 | 3.21  | 323.1098 | Desmedipham                                                                                         | [M+Na] <sup>+</sup>               | Benzenoids                       |
| 275 | 3.218 | 752.4186 | Germinaline                                                                                         | [M+H] <sup>+</sup>                | Undefined                        |
| 276 | 3.219 | 177.0192 | Daphnetin                                                                                           | [M-H] <sup>-</sup>                | Phenylpropanoids and polyketides |
| 277 | 3.227 | 395.1279 | Syringin                                                                                            | [M+Na] <sup>+</sup>               | Organic oxygen compounds         |
| 278 | 3.23  | 369.1169 | Dimethyl 2-[3-(4-hydroxy-3,5-dimethoxyphenyl)prop-2-enoyloxy]butanedioate                           | [M+H] <sup>+</sup>                | Phenylpropanoids and polyketides |
| 279 | 3.253 | 195.0639 | Isoferulic acid                                                                                     | [M+H] <sup>+</sup>                | Phenylpropanoids and polyketides |
| 280 | 3.258 | 172.098  | N-Acetyl-L-leucine                                                                                  | [M-H] <sup>-</sup>                | Organic acids and derivatives    |
| 281 | 3.27  | 165.0564 | L-(-)-3-Phenyllactic acid                                                                           | [M-H] <sup>-</sup>                | Phenylpropanoids and polyketides |
| 282 | 3.284 | 551.2769 | Isogomphrenin I                                                                                     | [M+H] <sup>+</sup>                | Organic oxygen compounds         |
| 283 | 3.298 | 769.221  | 7-O-Methylquercetin-3-O-galactoside-6"-rhamnoside                                                   | [M-H] <sup>-</sup>                | Phenylpropanoids and polyketides |
| 284 | 3.321 | 325.0921 | Coumaric acid 4-O-glucoside                                                                         | [M-H] <sup>-</sup>                | Organic oxygen compounds         |
| 285 | 3.323 | 243.1709 | H-DL-xille-DL-xille-OH                                                                              | [M-H] <sup>-</sup>                | Organic acids and derivatives    |
| 286 | 3.326 | 193.0511 | Cinnamic acid                                                                                       | [M-H] <sup>-</sup>                | Phenylpropanoids and polyketides |
| 287 | 3.332 | 495.2563 | Leukotriene D4                                                                                      | [M-H] <sup>-</sup>                | Lipids and lipid-like molecules  |
| 288 | 3.343 | 367.1016 | Methyl chlorogenate                                                                                 | [M-H] <sup>-</sup>                | Organic oxygen compounds         |
| 289 | 3.351 | 439.1554 | Sayaenoside                                                                                         | [M+Na] <sup>+</sup>               | Organic oxygen compounds         |
| 290 | 3.367 | 368.1757 | Jacobine N-oxide                                                                                    | [M+H] <sup>+</sup>                | Alkaloids and derivatives        |
| 291 | 3.369 | 121.0288 | Hydron;benzoate                                                                                     | [M-H] <sup>-</sup>                | Benzenoids                       |
| 292 | 3.377 | 611.1547 | Cyanin                                                                                              | [M] <sup>+</sup>                  | Phenylpropanoids and polyketides |
| 293 | 3.385 | 449.1078 | Luteolin-4'-o-glucoside                                                                             | [M+H] <sup>+</sup>                | Phenylpropanoids and polyketides |
| 294 | 3.398 | 349.1173 | (13-Methyl-17-oxo-7,8,9,11,12,14,15,16-octahydro-6H-cyclopenta[a]phenanthren-3-yl) hydrogen sulfate | [M-H] <sup>-</sup>                | Lipids and lipid-like molecules  |
| 295 | 3.401 | 321.0925 | N(4)-Acetylsulfamethazine                                                                           | [M+H] <sup>+</sup>                | Benzenoids                       |

|     |       |          |                                                                                                                                                                                      |                     |                                           |
|-----|-------|----------|--------------------------------------------------------------------------------------------------------------------------------------------------------------------------------------|---------------------|-------------------------------------------|
| 296 | 3.401 | 561.1935 | 2-Methoxy-4-[(2R,3R,4S)-tetrahydro-4-hydroxy-4-[(4-hydroxy-3-methoxyphenyl)methyl]-3-(hydroxymethyl)-2-furanyl]phenyl-beta-D-glucopyranoside                                         | [M+Na] <sup>+</sup> | Lignans, neolignans and related compounds |
| 297 | 3.403 | 305.1109 | Diazinon                                                                                                                                                                             | [M+H] <sup>+</sup>  | Organic acids and derivatives             |
| 298 | 3.408 | 172.098  | Acetylleucine                                                                                                                                                                        | [M-H] <sup>-</sup>  | Organic acids and derivatives             |
| 299 | 3.414 | 605.1809 | Methyl (4S,5Z,6S)-5-(2-acetyloxyethylidene)-4-[2-[2-(4-hydroxyphenyl)ethoxy]-2-oxoethyl]-6-[(2S,3R,4S,5S,6R)-3,4,5-trihydroxy-6-(hydroxymethyl)oxan-2-yl]oxy-4H-pyran-3-carboxylate  | [M+Na] <sup>+</sup> | Lipids and lipid-like molecules           |
| 300 | 3.426 | 309.094  | Salicin                                                                                                                                                                              | [M+H] <sup>+</sup>  | Organic oxygen compounds                  |
| 301 | 3.438 | 291.0833 | Chloroxuron                                                                                                                                                                          | [M+H] <sup>+</sup>  | Benzenoids                                |
| 302 | 3.438 | 190.0503 | 5-Hydroxyindole-3-acetic acid                                                                                                                                                        | [M-H] <sup>-</sup>  | Organoheterocyclic compounds              |
| 303 | 3.446 | 755.1826 | Quercetin 3-O-[2''-O-(6'''-O-p-coumaroyl)-b-D-glucopyranosyl]-a-L-rhamnopyranoside                                                                                                   | [M-H] <sup>-</sup>  | Undefined                                 |
| 304 | 3.452 | 148.038  | Isatin                                                                                                                                                                               | [M+H] <sup>+</sup>  | Organoheterocyclic compounds              |
| 305 | 3.453 | 281.1376 | Octyl gallate                                                                                                                                                                        | [M-H] <sup>-</sup>  | Undefined                                 |
| 306 | 3.47  | 222.1342 | DL-Dihydrozeatin                                                                                                                                                                     | [M+H] <sup>+</sup>  | Organoheterocyclic compounds              |
| 307 | 3.488 | 492.2446 | Imatinib                                                                                                                                                                             | [M-H] <sup>-</sup>  | Benzenoids                                |
| 308 | 3.508 | 342.1438 | Sulpiride                                                                                                                                                                            | [M+H] <sup>+</sup>  | Benzenoids                                |
| 309 | 3.513 | 349.1829 | Imidocarb                                                                                                                                                                            | [M+H] <sup>+</sup>  | Benzenoids                                |
| 310 | 3.516 | 206.0816 | N-Acetyl-L-phenylalanine                                                                                                                                                             | [M-H] <sup>-</sup>  | Organic acids and derivatives             |
| 311 | 3.527 | 370.1765 | Amisulpride                                                                                                                                                                          | [M+H] <sup>+</sup>  | Benzenoids                                |
| 312 | 3.539 | 669.3503 | Goshonoside F5                                                                                                                                                                       | [M+Na] <sup>+</sup> | Lipids and lipid-like molecules           |
| 313 | 3.539 | 298.0965 | 5'-Deoxy-5'-methylthioadenosine                                                                                                                                                      | [M+H] <sup>+</sup>  | Nucleosides, nucleotides, and analogues   |
| 314 | 3.544 | 163.0398 | 3-(3-Hydroxy-phenyl)-acrylic acid                                                                                                                                                    | [M-H] <sup>-</sup>  | Phenylpropanoids and polyketides          |
| 315 | 3.549 | 445.1608 | Tetracycline                                                                                                                                                                         | [M+H] <sup>+</sup>  | Phenylpropanoids and polyketides          |
| 316 | 3.581 | 204.066  | Indole-3-lactic acid                                                                                                                                                                 | [M-H] <sup>-</sup>  | Organoheterocyclic compounds              |
| 317 | 3.598 | 609.145  | Luteolin-7,3'-di-O-galactoside                                                                                                                                                       | [M-H] <sup>-</sup>  | Phenylpropanoids and polyketides          |
| 318 | 3.603 | 175.0253 | Ascorbic acid                                                                                                                                                                        | [M-H] <sup>-</sup>  | Organoheterocyclic compounds              |
| 319 | 3.603 | 609.1694 | 5-Hydroxy-2-(3-hydroxy-4-methoxyphenyl)-7-[(2S,3R,4S,5S,6R)-3,4,5-trihydroxy-6-[(2R,3R,4R,5R,6S)-3,4,5-trihydroxy-6-methyloxan-2-yl]oxymethyl]oxan-2-yl]oxy-2,3-dihydrochromen-4-one | [M-H] <sup>-</sup>  | Phenylpropanoids and polyketides          |
| 320 | 3.631 | 421.0742 | Mangiferin                                                                                                                                                                           | [M-H] <sup>-</sup>  | Organoheterocyclic compounds              |
| 321 | 3.641 | 385.1133 | 1-O-Sinapoyl-beta-D-glucose                                                                                                                                                          | [M-H] <sup>-</sup>  | Phenylpropanoids and polyketides          |
| 322 | 3.647 | 409.1093 | Khelloside                                                                                                                                                                           | [M+H] <sup>+</sup>  | Organoheterocyclic compounds              |
| 323 | 3.66  | 394.1968 | Glutamyl-valyl-phenylalanine                                                                                                                                                         | [M+H] <sup>+</sup>  | Organic acids and derivatives             |
| 324 | 3.67  | 245.094  | N-Acetyl-D-tryptophan                                                                                                                                                                | [M-H] <sup>-</sup>  | Organic acids and derivatives             |

|     |       |          |                                                                                                                                 |                        |                                           |
|-----|-------|----------|---------------------------------------------------------------------------------------------------------------------------------|------------------------|-------------------------------------------|
| 325 | 3.705 | 265.1425 | Dihydro-3-methylene-4-[(2E)-3-methyl-4-(tetrahydro-4-methyl-5-oxo-2-furanyl)-2-buten-1-yl]-, (4R)-2(3H)-furanone,               | [M+H] <sup>+</sup>     | Lipids and lipid-like molecules           |
| 326 | 3.724 | 163.0403 | Phenylpyruvic acid                                                                                                              | [M-H] <sup>-</sup>     | Benzenoids                                |
| 327 | 3.726 | 559.1746 | 8-Hydroxypinoresinol 4'-glucoside                                                                                               | [M+Na] <sup>+</sup>    | Lignans, neolignans and related compounds |
| 328 | 3.732 | 411.2184 | Risperidone                                                                                                                     | [M+H] <sup>+</sup>     | Organoheterocyclic compounds              |
| 329 | 3.733 | 406.2314 | H-Leu-Leu-Tyr-OH                                                                                                                | [M-H] <sup>-</sup>     | Organic acids and derivatives             |
| 330 | 3.782 | 218.1051 | trans-Zeatin                                                                                                                    | [M-H] <sup>-</sup>     | Organoheterocyclic compounds              |
| 331 | 3.802 | 393.2091 | Octaethylene glycol                                                                                                             | [M+Na] <sup>+</sup>    | Organic oxygen compounds                  |
| 332 | 3.819 | 431.2488 | Bufalin                                                                                                                         | [M+FA-H] <sup>-</sup>  | Undefined                                 |
| 333 | 3.823 | 375.1308 | Riboflavin                                                                                                                      | [M-H] <sup>-</sup>     | Organoheterocyclic compounds              |
| 334 | 3.829 | 357.1333 | Pinoresinol                                                                                                                     | [M-H] <sup>-</sup>     | Lignans, neolignans and related compounds |
| 335 | 3.851 | 639.161  | isorhamnetin-3-glucoside-4'-glucoside (Isorhamnetin 3,4'-diglucoside)                                                           | [M-H] <sup>-</sup>     | Undefined                                 |
| 336 | 3.87  | 455.151  | 5-(1-benzofuran-2-yl)-N,N-dimethyl-2-[4-(piperazin-1-yl)phenyl]-1,3-thiazole-4-carboxamide                                      | [M+Na] <sup>+</sup>    | Organoheterocyclic compounds              |
| 337 | 3.873 | 575.1696 | 2-Methoxy-4-[tetrahydro-3a,6a-dihydroxy-4-(4-hydroxy-3-methoxyphenyl)-1H,3H-furo[3,4-c]furan-1-yl]phenyl-beta-D-glucopyranoside | [M+Na] <sup>+</sup>    | Lignans, neolignans and related compounds |
| 338 | 3.883 | 421.161  | 3-[(7S,8S)-5-Hydroxy-2,2,7,8-tetramethyl-6-oxo-7,8-dihydropyrano[3,2-g]chromen-10-yl]-3-phenylpropanoic acid                    | [M-H] <sup>-</sup>     | Organoheterocyclic compounds              |
| 339 | 3.884 | 134.0584 | Indoxyl sulfate                                                                                                                 | [M+H] <sup>+</sup>     | Organic acids and derivatives             |
| 340 | 3.9   | 247.1065 | N-(6-Methoxyquinolin-8-yl)alanine                                                                                               | [M+H] <sup>+</sup>     | Organoheterocyclic compounds              |
| 341 | 3.932 | 121.0294 | 4-Hydroxybenzaldehyde                                                                                                           | [M-H] <sup>-</sup>     | Organic oxygen compounds                  |
| 342 | 3.934 | 137.0585 | Sabinene                                                                                                                        | [M+H] <sup>+</sup>     | Lipids and lipid-like molecules           |
| 343 | 3.94  | 181.0498 | Methyl vanillate                                                                                                                | [M-H] <sup>-</sup>     | Benzenoids                                |
| 344 | 3.941 | 195.0665 | 3-(4-Hydroxy-3-methoxyphenyl)propionic acid                                                                                     | [M-H] <sup>-</sup>     | Phenylpropanoids and polyketides          |
| 345 | 3.967 | 611.1966 | Dihydrohesperetin-7-O-neohesperidoside                                                                                          | [M-H] <sup>-</sup>     | Undefined                                 |
| 346 | 3.975 | 623.2769 | Thalsimidine                                                                                                                    | [M+H] <sup>+</sup>     | Lignans, neolignans and related compounds |
| 347 | 3.984 | 114.0372 | 4-Isothiocyanato-1-butene                                                                                                       | [M+2Na-H] <sup>+</sup> | Undefined                                 |
| 348 | 4     | 301.0352 | Quercetin                                                                                                                       | [M-H] <sup>-</sup>     | Phenylpropanoids and polyketides          |
| 349 | 4.003 | 193.0499 | Ferulic acid                                                                                                                    | [M-H] <sup>-</sup>     | Phenylpropanoids and polyketides          |
| 350 | 4.005 | 223.0605 | Sinapic acid                                                                                                                    | [M-H] <sup>-</sup>     | Phenylpropanoids and polyketides          |
| 351 | 4.006 | 285.0412 | Rhein                                                                                                                           | [M+H] <sup>+</sup>     | Benzenoids                                |
| 352 | 4.021 | 181.0846 | Isopropyl 4-Hydroxybenzoate                                                                                                     | [M+H] <sup>+</sup>     | Undefined                                 |
| 353 | 4.038 | 427.1693 | [1-(3,4-Dihydroxy-5-methoxyphenyl)-7-(3,4-dihydroxyphenyl)heptan-3-yl] acetate                                                  | [M+Na] <sup>+</sup>    | Phenylpropanoids and polyketides          |
| 354 | 4.039 | 593.2589 | 1,7-Bis(4-hydroxyphenyl)-3-heptanyl 2-O-[(2S,3R,4R)-3,4-dihydroxy-4-(hydroxymethyl)tetrahydro-2-furanyl]-beta-D-glucopyranoside | [M-H] <sup>-</sup>     | Phenylpropanoids and polyketides          |

|     |       |          |                                                                                                                                                                                                                                           |                     |                                           |
|-----|-------|----------|-------------------------------------------------------------------------------------------------------------------------------------------------------------------------------------------------------------------------------------------|---------------------|-------------------------------------------|
| 355 | 4.04  | 177.0544 | Hymecromone                                                                                                                                                                                                                               | [M+H] <sup>+</sup>  | Phenylpropanoids and polyketides          |
| 356 | 4.047 | 453.2084 | 6-(beta-D-Glucopyranosyloxy)-4,5,6,7,8,8a-hexahydro-5-hydroxy-5-(1-hydroxy-1-methylethyl)-3,8-dimethyl-2(1H)-azulenone                                                                                                                    | [M+Na] <sup>+</sup> | Lipids and lipid-like molecules           |
| 357 | 4.055 | 352.1601 | trans-Ribosylzeatin                                                                                                                                                                                                                       | [M+H] <sup>+</sup>  | Nucleosides, nucleotides, and analogues   |
| 358 | 4.059 | 167.0702 | Ethylparaben                                                                                                                                                                                                                              | [M+H] <sup>+</sup>  | Benzenoids                                |
| 359 | 4.073 | 413.1193 | 2,3,4,9,10-Pentamethoxy-6a,11a-dihydro-6H-[1]benzofuro[3,2-c]chromen-8-ol                                                                                                                                                                 | [M+Na] <sup>+</sup> | Phenylpropanoids and polyketides          |
| 360 | 4.088 | 167.0611 | 9H-Pyrido[3,4-B]indole                                                                                                                                                                                                                    | [M-H] <sup>-</sup>  | Organoheterocyclic compounds              |
| 361 | 4.089 | 399.1077 | 4'-Demethylpodophyllotoxin                                                                                                                                                                                                                | [M-H] <sup>-</sup>  | Lignans, neolignans and related compounds |
| 362 | 4.089 | 191.0352 | Scopoletin                                                                                                                                                                                                                                | [M-H] <sup>-</sup>  | Phenylpropanoids and polyketides          |
| 363 | 4.095 | 174.057  | Indole-3-acetic acid                                                                                                                                                                                                                      | [M-H] <sup>-</sup>  | Organoheterocyclic compounds              |
| 364 | 4.097 | 575.2067 | Lyoniside                                                                                                                                                                                                                                 | [M+Na] <sup>+</sup> | Lignans, neolignans and related compounds |
| 365 | 4.106 | 415.1043 | Puerarin                                                                                                                                                                                                                                  | [M-H] <sup>-</sup>  | Undefined                                 |
| 366 | 4.112 | 449.1046 | Cyanidin 3-O-glucoside                                                                                                                                                                                                                    | [M] <sup>+</sup>    | Phenylpropanoids and polyketides          |
| 367 | 4.113 | 609.1448 | Panasenoside                                                                                                                                                                                                                              | [M-H] <sup>-</sup>  | Phenylpropanoids and polyketides          |
| 368 | 4.116 | 447.0894 | Astragalin                                                                                                                                                                                                                                | [M-H] <sup>-</sup>  | Phenylpropanoids and polyketides          |
| 369 | 4.131 | 229.0861 | Resveratrol                                                                                                                                                                                                                               | [M+H] <sup>+</sup>  | Phenylpropanoids and polyketides          |
| 370 | 4.142 | 169.0751 | 5H-Pyrido[4,3-b]indole                                                                                                                                                                                                                    | [M+H] <sup>+</sup>  | Organoheterocyclic compounds              |
| 371 | 4.171 | 765.2581 | (2S,3R,4S,5S,6R)-2-[4-[(3S,3aR,6S,6aR)-6-[3,5-Dimethoxy-4-[(2S,3R,4S,5S,6R)-3,4,5-trihydroxy-6-(hydroxymethyl)oxan-2-yl]oxyphenyl]-1,3,3a,4,6,6a-hexahydrofuro[3,4-c]furan-3-yl]-2,6-dimethoxyphenoxy]-6-(hydroxymethyl)oxane-3,4,5-triol | [M+Na] <sup>+</sup> | Lignans, neolignans and related compounds |
| 372 | 4.18  | 325.0904 | Skimmin                                                                                                                                                                                                                                   | [M+H] <sup>+</sup>  | Phenylpropanoids and polyketides          |
| 373 | 4.195 | 646.3165 | Aconitine                                                                                                                                                                                                                                 | [M+H] <sup>+</sup>  | Lipids and lipid-like molecules           |
| 374 | 4.22  | 361.1645 | Secoisolariciresinol                                                                                                                                                                                                                      | [M-H] <sup>-</sup>  | Undefined                                 |
| 375 | 4.244 | 441.1165 | Barbaloin                                                                                                                                                                                                                                 | [M+Na] <sup>+</sup> | Benzenoids                                |
| 376 | 4.263 | 399.1398 | Ailanthone                                                                                                                                                                                                                                | [M+Na] <sup>+</sup> | Lipids and lipid-like molecules           |
| 377 | 4.268 | 211.1435 | (3S,8As)-3-Isobutylhexahydropyrrolo[1,2-a]pyrazine-1,4-dione                                                                                                                                                                              | [M+H] <sup>+</sup>  | Organic acids and derivatives             |
| 378 | 4.278 | 345.1873 | 3-[(4As,12aR)-2-methyl-1,3,4,5,12,12a-hexahydropyrido[3,4-b]acridin-4a-yl]phenol                                                                                                                                                          | [M+H] <sup>+</sup>  | Organoheterocyclic compounds              |
| 379 | 4.285 | 217.1074 | 3-Hydroxysebacic acid                                                                                                                                                                                                                     | [M-H] <sup>-</sup>  | Organic acids and derivatives             |
| 380 | 4.286 | 303.1186 | (3As,6S,7R,8aR)-8-hydroxy-6,8-dimethyl-3-methylidenespiro[4,5,6,8a-tetrahydro-3aH-cyclohepta[b]furan-7,5'-oxolane]-2,2'-dione                                                                                                             | [M+Na] <sup>+</sup> | Lipids and lipid-like molecules           |
| 381 | 4.306 | 545.1977 | 2-(Hydroxymethyl)-6-[5-[3-(hydroxymethyl)-5-(3-hydroxypropyl)-7-methoxy-2,3-dihydro-1-benzofuran-2-yl]-2-methoxyphenoxy]oxane-3,4,5-triol                                                                                                 | [M+Na] <sup>+</sup> | Phenylpropanoids and polyketides          |
| 382 | 4.308 | 139.11   | Isophorone                                                                                                                                                                                                                                | [M+H] <sup>+</sup>  | Organic oxygen compounds                  |
| 383 | 4.331 | 247.129  | Santonin                                                                                                                                                                                                                                  | [M+H] <sup>+</sup>  | Lipids and lipid-like molecules           |

|     |       |          |                                                                                                                                                                                            |                     |                                           |
|-----|-------|----------|--------------------------------------------------------------------------------------------------------------------------------------------------------------------------------------------|---------------------|-------------------------------------------|
| 384 | 4.352 | 395.1754 | Veraguensin                                                                                                                                                                                | [M+Na] <sup>+</sup> | Lignans, neolignans and related compounds |
| 385 | 4.355 | 329.1569 | Tiapride                                                                                                                                                                                   | [M+H] <sup>+</sup>  | Benzenoids                                |
| 386 | 4.377 | 178.0512 | (Sulfonatoazaniumyl)cyclohexane                                                                                                                                                            | [M-H] <sup>-</sup>  | Organic acids and derivatives             |
| 387 | 4.378 | 307.114  | Cimifugin                                                                                                                                                                                  | [M+H] <sup>+</sup>  | Organoheterocyclic compounds              |
| 388 | 4.402 | 501.1581 | [3,4,5-Trihydroxy-6-[(3,4,5-trihydroxyoxan-2-yl)oxymethyl]oxan-2-yl] 2,6,6-trimethylcyclohexene-1-carboxylate                                                                              | [M+K] <sup>+</sup>  | Organic oxygen compounds                  |
| 389 | 4.427 | 160.0399 | Indole-3-carboxylic acid                                                                                                                                                                   | [M-H] <sup>-</sup>  | Organoheterocyclic compounds              |
| 390 | 4.446 | 525.2886 | 4,4,8,10,14-Pentamethyl-17-(4,5,6-trihydroxy-6-methylheptan-2-yl)-2,5,6,7,9,15-hexahydro-1H-cyclopenta[a]phenanthrene-3,16-dione                                                           | [M+K] <sup>+</sup>  | Lipids and lipid-like molecules           |
| 391 | 4.458 | 339.1056 | (3R,5R)-1,3,5-trihydroxy-4-[(E)-3-(4-hydroxyphenyl)acryloyl]oxy-cyclohexanecarboxylic acid                                                                                                 | [M+H] <sup>+</sup>  | Organic oxygen compounds                  |
| 392 | 4.469 | 144.0462 | Indole-3-carboxaldehyde                                                                                                                                                                    | [M-H] <sup>-</sup>  | Organoheterocyclic compounds              |
| 393 | 4.471 | 473.1405 | [(1S)-5-hydroxy-1-[(2S,3R,4S,5S,6R)-3,4,5-trihydroxy-6-(hydroxymethyl)oxan-2-yl]oxy-1,4a,5,7a-tetrahydrocyclopenta[c]pyran-7-yl]methyl benzoate                                            | [M+Na] <sup>+</sup> | Lipids and lipid-like molecules           |
| 394 | 4.485 | 177.0557 | 4-Hydroxy-3-methoxycinnamaldehyde                                                                                                                                                          | [M-H] <sup>-</sup>  | Benzenoids                                |
| 395 | 4.488 | 209.0788 | 3,5-Dimethoxycinnamic acid                                                                                                                                                                 | [M+H] <sup>+</sup>  | Phenylpropanoids and polyketides          |
| 396 | 4.524 | 443.1286 | Isorhapontin                                                                                                                                                                               | [M+Na] <sup>+</sup> | Phenylpropanoids and polyketides          |
| 397 | 4.529 | 285.1669 | (4E,6E)-2-(Hydroxymethyl)-3-(3-methoxy-3-oxopropyl)deca-4,6-dienoic acid                                                                                                                   | [M+H] <sup>+</sup>  | Lipids and lipid-like molecules           |
| 398 | 4.541 | 428.2492 | (3R,7R,8R,8aS)-3,4'-Dihydroxy-7'-(2-hydroxyethyl)-4,4,7,8a-tetramethylspiro[2,3,4a,5,6,7-hexahydro-1H-naphthalene-8,2'-3,8-dihydrofuro[2,3-e]isoindole]-6'-one                             | [M-H] <sup>-</sup>  | Organoheterocyclic compounds              |
| 399 | 4.543 | 197.1177 | Lolilide                                                                                                                                                                                   | [M+H] <sup>+</sup>  | Organoheterocyclic compounds              |
| 400 | 4.555 | 631.1605 | Diosmetin-7-O-rutinoside                                                                                                                                                                   | [M+Na] <sup>+</sup> | Phenylpropanoids and polyketides          |
| 401 | 4.556 | 616.3171 | Hypaconitine                                                                                                                                                                               | [M+H] <sup>+</sup>  | Lipids and lipid-like molecules           |
| 402 | 4.575 | 336.1893 | Senecionine                                                                                                                                                                                | [M+H] <sup>+</sup>  | Phenylpropanoids and polyketides          |
| 403 | 4.577 | 535.2325 | Methyl 2-[(1R,5R,6R,13S,14S,16S)-14-acetyloxy-6-(furan-3-yl)-1,5,15,15-tetramethyl-8,17-dioxo-7-oxatetracyclo[11.3.1.02,11.05,10]heptadec-10-en-16-yl]acetate                              | [M+Na] <sup>+</sup> | Lipids and lipid-like molecules           |
| 404 | 4.587 | 486.2569 | 3',4',4'a,5',6,6',7',8,8',8'a-Decahydro-4,6',7'-trihydroxy-2',5',5',8'a-tetramethyl-6-oxo-, (2R,2'R,6'S,7'R,8'aS)-spiro[2H-furo[2,3-e]isoindole-2,1'(2'H)-naphthalene]-7(3H)-butanoic acid | [M-H] <sup>-</sup>  | Organoheterocyclic compounds              |
| 405 | 4.589 | 312.13   | Imazaquin                                                                                                                                                                                  | [M+H] <sup>+</sup>  | Organoheterocyclic compounds              |
| 406 | 4.626 | 179.0348 | 4-Hydroxyphenylpyruvic acid                                                                                                                                                                | [M-H] <sup>-</sup>  | Benzenoids                                |
| 407 | 4.628 | 208.1307 | Benzoylcholine                                                                                                                                                                             | [M] <sup>+</sup>    | Benzenoids                                |
| 408 | 4.634 | 245.1276 | Hexahydro-3-(phenylmethyl)-pyrrolo[1,2-a]pyrazine-1,4-dione                                                                                                                                | [M+H] <sup>+</sup>  | Organic acids and derivatives             |
| 409 | 4.662 | 405.1538 | Neosolaniol                                                                                                                                                                                | [M+Na] <sup>+</sup> | Lipids and lipid-like molecules           |

|     |       |          |                                                                                                                                                            |                                     |                                  |
|-----|-------|----------|------------------------------------------------------------------------------------------------------------------------------------------------------------|-------------------------------------|----------------------------------|
| 410 | 4.676 | 128.1062 | N-Cyclohexylformamide                                                                                                                                      | [M+H] <sup>+</sup>                  | Organic acids and derivatives    |
| 411 | 4.68  | 653.3216 | Isohernandezine                                                                                                                                            | [M+H] <sup>+</sup>                  | Phenylpropanoids and polyketides |
| 412 | 4.68  | 359.1452 | Triptonide                                                                                                                                                 | [M+H] <sup>+</sup>                  | Undefined                        |
| 413 | 4.689 | 287.0554 | Dihydrokaempferol                                                                                                                                          | [M-H] <sup>-</sup>                  | Undefined                        |
| 414 | 4.698 | 413.2127 | Hexa(methoxymethyl)melamine                                                                                                                                | [M+Na] <sup>+</sup>                 | Organic nitrogen compounds       |
| 415 | 4.723 | 182.1886 | Dicyclohexylamine                                                                                                                                          | [M+H] <sup>+</sup>                  | Organic nitrogen compounds       |
| 416 | 4.742 | 632.3373 | Pseudojervine                                                                                                                                              | [M+FA-H] <sup>-</sup>               | Undefined                        |
| 417 | 4.758 | 753.2246 | Hedysarimcoumestan D                                                                                                                                       | [M-H] <sup>-</sup>                  | Phenylpropanoids and polyketides |
| 418 | 4.759 | 487.3043 | Polygalic acid                                                                                                                                             | [M-H] <sup>-</sup>                  | Undefined                        |
| 419 | 4.763 | 531.169  | Sibiricose A6                                                                                                                                              | [M-H <sub>2</sub> O+H] <sup>+</sup> | Phenylpropanoids and polyketides |
| 420 | 4.766 | 529.3004 | Kukoamine A                                                                                                                                                | [M-H] <sup>-</sup>                  | Undefined                        |
| 421 | 4.806 | 411.1608 | 2-[(2Z)-5-(Hexopyranosyloxy)-2-penten-1-yl]-3-oxo-, (1R,2R)-cyclopentaneacetic acid                                                                        | [M+Na] <sup>+</sup>                 | Lipids and lipid-like molecules  |
| 422 | 4.809 | 213.0303 | Mecoprop                                                                                                                                                   | [M-H] <sup>-</sup>                  | Benzenoids                       |
| 423 | 4.83  | 151.0399 | 4-Methoxybenzoic acid                                                                                                                                      | [M-H] <sup>-</sup>                  | Benzenoids                       |
| 424 | 4.841 | 225.1457 | 5-(6-Methyl-7-oxooctyl)furan-2(5H)-one                                                                                                                     | [M+H] <sup>+</sup>                  | Organoheterocyclic compounds     |
| 425 | 4.842 | 292.1889 | 2-Oxostenine                                                                                                                                               | [M+H] <sup>+</sup>                  | Alkaloids and derivatives        |
| 426 | 4.842 | 310.162  | Sinapine                                                                                                                                                   | [M] <sup>+</sup>                    | Phenylpropanoids and polyketides |
| 427 | 4.851 | 186.2213 | Tributylamine                                                                                                                                              | [M+H] <sup>+</sup>                  | Organic nitrogen compounds       |
| 428 | 4.853 | 195.0618 | Dimethyl phthalate                                                                                                                                         | [M+H] <sup>+</sup>                  | Benzenoids                       |
| 429 | 4.86  | 331.1175 | 3-(2,4-Dihydroxypentyl)-6,8-dimethoxyisochromen-1-one                                                                                                      | [M+Na] <sup>+</sup>                 | Phenylpropanoids and polyketides |
| 430 | 4.885 | 178.035  | Sulforaphane                                                                                                                                               | [M+H] <sup>+</sup>                  | Organosulfur compounds           |
| 431 | 4.912 | 723.2134 | Ligustroflavone                                                                                                                                            | [M-H] <sup>-</sup>                  | Undefined                        |
| 432 | 4.925 | 343.0651 | (9-Hydroxy-8,8-dimethyl-2-oxo-9,10-dihydropyrano[2,3-f]chromen-10-yl) acetate                                                                              | [M+K] <sup>+</sup>                  | Phenylpropanoids and polyketides |
| 433 | 4.943 | 213.056  | 3-Phenoxybenzoic acid                                                                                                                                      | [M-H] <sup>-</sup>                  | Benzenoids                       |
| 434 | 4.966 | 261.133  | 9-(2,3-Dihydroxypropoxy)-9-oxononanoic acid                                                                                                                | [M-H] <sup>-</sup>                  | Lipids and lipid-like molecules  |
| 435 | 4.978 | 327.1771 | Gelsenicine                                                                                                                                                | [M+H] <sup>+</sup>                  | Organoheterocyclic compounds     |
| 436 | 4.999 | 411.1972 | gamma-Tocotrienol                                                                                                                                          | [M+H] <sup>+</sup>                  | Lipids and lipid-like molecules  |
| 437 | 5.022 | 485.1957 | (1R,4S,7S,8S,9R,12E,20R,21R,22S,23S)-7,8,21,22,23-Pentahydroxy-12,16-dimethyl-3,5,10,19,24-pentaoxatricyclo[18.3.1.0 <sub>4,9</sub> ]tetracos-12-en-11-one | [M+Na] <sup>+</sup>                 | Organic oxygen compounds         |
| 438 | 5.028 | 385.083  | Methyl 2-hydroxy-6-(4-hydroxy-2-methoxy-6-methoxycarbonylphenoxy)-4-methylbenzoate                                                                         | [M+Na] <sup>+</sup>                 | Benzenoids                       |
| 439 | 5.061 | 447.0937 | Kaempferol-3-O-glucoside                                                                                                                                   | [M-H] <sup>-</sup>                  | Undefined                        |
| 440 | 5.062 | 463.0869 | Hyperoside                                                                                                                                                 | [M-H] <sup>-</sup>                  | Phenylpropanoids and polyketides |

|     |       |          |                                                                                                                                                              |                       |                                         |
|-----|-------|----------|--------------------------------------------------------------------------------------------------------------------------------------------------------------|-----------------------|-----------------------------------------|
| 441 | 5.064 | 519.2398 | [(2R,3S,4S,5R,6S)-3,4,5-Trihydroxy-6-[(2S,3R,4S,5S,6R)-3,4,5-trihydroxy-6-(hydroxymethyl)oxan-2-yl]oxyoxan-2-yl)methyl 8-methylnonanoate                     | [M+Na] <sup>+</sup>   | Lipids and lipid-like molecules         |
| 442 | 5.069 | 325.1628 | Citalopram                                                                                                                                                   | [M+H] <sup>+</sup>    | Benzenoids                              |
| 443 | 5.07  | 535.2133 | Aerucyclamide A                                                                                                                                              | [M+H] <sup>+</sup>    | Organic acids and derivatives           |
| 444 | 5.076 | 415.1949 | Hexose + C <sub>13</sub> H <sub>19</sub> O                                                                                                                   | [M+HCOO] <sup>-</sup> | Lipids and lipid-like molecules         |
| 445 | 5.079 | 222.0224 | 5-Ammonio-2-naphthalenesulfonate                                                                                                                             | [M-H] <sup>-</sup>    | Benzenoids                              |
| 446 | 5.103 | 321.1291 | [2-[(E)-3,4-Dihydroxypent-1-enyl]-6-oxooxan-3-yl] (E)-2-methylbut-2-enoate                                                                                   | [M+Na] <sup>+</sup>   | Organoheterocyclic compounds            |
| 447 | 5.116 | 89.0587  | Isobutyric acid                                                                                                                                              | [M+H] <sup>+</sup>    | Organic acids and derivatives           |
| 448 | 5.116 | 187.0982 | Hydron;nonanedioate                                                                                                                                          | [M-H] <sup>-</sup>    | Lipids and lipid-like molecules         |
| 449 | 5.134 | 489.2258 | Cytidine 5'-diphosphocholine                                                                                                                                 | [M+H] <sup>+</sup>    | Nucleosides, nucleotides, and analogues |
| 450 | 5.138 | 275.1386 | N-[1H-Indol-3-yl-acetyl]valine acid                                                                                                                          | [M+H] <sup>+</sup>    | Organic acids and derivatives           |
| 451 | 5.142 | 385.2152 | Corynoxine B                                                                                                                                                 | [M+H] <sup>+</sup>    | Undefined                               |
| 452 | 5.145 | 207.0633 | Sinapoyl malate                                                                                                                                              | [M+H] <sup>+</sup>    | Phenylpropanoids and polyketides        |
| 453 | 5.147 | 158.0619 | Indole-3-acetaldehyde                                                                                                                                        | [M-H] <sup>-</sup>    | Organoheterocyclic compounds            |
| 454 | 5.147 | 172.0416 | Quinoline-4-carboxylic acid                                                                                                                                  | [M-H] <sup>-</sup>    | Organoheterocyclic compounds            |
| 455 | 5.153 | 188.0707 | 3-Indolepropionic acid                                                                                                                                       | [M-H] <sup>-</sup>    | Organoheterocyclic compounds            |
| 456 | 5.162 | 269.1727 | 3-[4-Methyl-1-(2-methylpropanoyl)-3-oxocyclohexyl]butanoic acid                                                                                              | [M+H] <sup>+</sup>    | Lipids and lipid-like molecules         |
| 457 | 5.171 | 327.1764 | 4-{Methyl[3-phenyl-3-(pyridin-2-yl)propyl]amino}-4-oxobutanoic acid                                                                                          | [M+H] <sup>+</sup>    | Organoheterocyclic compounds            |
| 458 | 5.171 | 457.2367 | Vindoline                                                                                                                                                    | [M+H] <sup>+</sup>    | Undefined                               |
| 459 | 5.172 | 209.1174 | Pilocarpine                                                                                                                                                  | [M+H] <sup>+</sup>    | Alkaloids and derivatives               |
| 460 | 5.183 | 343.1166 | Kanakugiol                                                                                                                                                   | [M-H] <sup>-</sup>    | Phenylpropanoids and polyketides        |
| 461 | 5.23  | 191.1033 | Ligustilide                                                                                                                                                  | [M+H] <sup>+</sup>    | Organoheterocyclic compounds            |
| 462 | 5.235 | 271.152  | Quinolactacin A                                                                                                                                              | [M+H] <sup>+</sup>    | Organoheterocyclic compounds            |
| 463 | 5.245 | 325.1605 | (2E)-4-{Methyl[3-phenyl-3-(pyridin-2-yl)propyl]amino}-4-oxobut-2-enoic acid                                                                                  | [M+H] <sup>+</sup>    | Organoheterocyclic compounds            |
| 464 | 5.248 | 341.1335 | 8-Prenylnaringenin                                                                                                                                           | [M+H] <sup>+</sup>    | Phenylpropanoids and polyketides        |
| 465 | 5.258 | 243.0863 | Lumichrome                                                                                                                                                   | [M+H] <sup>+</sup>    | Organoheterocyclic compounds            |
| 466 | 5.263 | 385.2178 | Corynoxine                                                                                                                                                   | [M+H] <sup>+</sup>    | Undefined                               |
| 467 | 5.264 | 362.1485 | 9-Fluoro-3-methyl-10-(4-methylpiperazin-4-ium-1-yl)-7-oxo-2,3-dihydro-7H-[1,4]oxazino[2,3,4-ij]quinoline-6-carboxylate                                       | [M+H] <sup>+</sup>    | Organoheterocyclic compounds            |
| 468 | 5.272 | 174.0562 | 1-Methoxyindole-3-carbaldehyde                                                                                                                               | [M-H] <sup>-</sup>    | Organoheterocyclic compounds            |
| 469 | 5.277 | 176.0703 | 4-Methoxy-1H-indole-3-carbaldehyde                                                                                                                           | [M+H] <sup>+</sup>    | Organoheterocyclic compounds            |
| 470 | 5.282 | 547.1782 | [4a,7-Dihydroxy-7-methyl-1-[3,4,5-trihydroxy-6-(hydroxymethyl)oxan-2-yl]oxy-1,5,6,7a-tetrahydrocyclopenta[c]pyran-5-yl] (E)-3-(4-methoxyphenyl)prop-2-enoate | [M+Na] <sup>+</sup>   | Lipids and lipid-like molecules         |
| 471 | 5.289 | 529.2615 | Chaetoglobosin C                                                                                                                                             | [M+H] <sup>+</sup>    | Alkaloids and derivatives               |
| 472 | 5.294 | 253.1054 | (2S)-2-[(1S,2R)-1,2-Dihydroxypentyl]-4-methoxy-2,3-dihdropyran-6-one                                                                                         | [M+Na] <sup>+</sup>   | Organoheterocyclic compounds            |

|     |       |          |                                                                                                                                                                                            |            |                                         |
|-----|-------|----------|--------------------------------------------------------------------------------------------------------------------------------------------------------------------------------------------|------------|-----------------------------------------|
| 473 | 5.324 | 266.0891 | Adenosine                                                                                                                                                                                  | [M-H]-     | Nucleosides, nucleotides, and analogues |
| 474 | 5.334 | 483.1787 | (2R,3S,4S,5R,6R)-2-[[[(2S,3R,4R)-3,4-dihydroxy-4-(hydroxymethyl)oxolan-2-yl]oxymethyl]-6-[4-(4-hydroxyphenyl)butan-2-yloxy]oxane-3,4,5-triol                                               | [M+Na]+    | Lipids and lipid-like molecules         |
| 475 | 5.334 | 248.1828 | 5-(Hydroxymethyl)-3-(1-hydroxy-4-methylhexyl)oxolan-2-one                                                                                                                                  | [M+NH4]+   | Lipids and lipid-like molecules         |
| 476 | 5.334 | 227.1236 | 12-Hydroxyjasmonic acid                                                                                                                                                                    | [M+H]+     | Lipids and lipid-like molecules         |
| 477 | 5.336 | 172.1319 | 1-(Aminomethyl)cyclohexaneacetate                                                                                                                                                          | [M+H]+     | Organic acids and derivatives           |
| 478 | 5.34  | 275.1227 | Heteropeucenin, methyl ether                                                                                                                                                               | [M+H]+     | Organoheterocyclic compounds            |
| 479 | 5.347 | 349.1256 | (+)-Camptothecin                                                                                                                                                                           | [M+H]+     | Alkaloids and derivatives               |
| 480 | 5.357 | 609.23   | (1S,2S,3R,4S,7R,10S,12R,15S)-4,12-bis(acetyloxy)-1,9,15-trihydroxy-10,14,17,17-tetramethyl-11-oxo-6-oxatetracyclo[11.3.1.0 <sup>3,10</sup> .0 <sup>4,7</sup> ]heptadec-13-en-2-yl benzoate | [M+Na]+    | Lipids and lipid-like molecules         |
| 481 | 5.413 | 173.1194 | 3-Hydroxynonanoic acid                                                                                                                                                                     | [M-H]-     | Organic acids and derivatives           |
| 482 | 5.415 | 225.1483 | Methyl jasmonate                                                                                                                                                                           | [M+H]+     | Lipids and lipid-like molecules         |
| 483 | 5.424 | 263.1299 | Dormin                                                                                                                                                                                     | [M-H]-     | Lipids and lipid-like molecules         |
| 484 | 5.429 | 229.1222 | Bisphenol A                                                                                                                                                                                | [M+H]+     | Benzenoids                              |
| 485 | 5.429 | 247.1311 | Ambrosic acid                                                                                                                                                                              | [M-H2O+H]+ | Organoheterocyclic compounds            |
| 486 | 5.441 | 285.1673 | [5-Hydroxy-3-(hydroxymethyl)-2-oxo-6-propan-2-ylcyclohex-3-en-1-yl] 3-methylbutanoate                                                                                                      | [M+H]+     | Lipids and lipid-like molecules         |
| 487 | 5.441 | 193.1209 | Senkyunolide A                                                                                                                                                                             | [M+H]+     | Undefined                               |
| 488 | 5.455 | 149.0597 | L(+)-Tartaric acid                                                                                                                                                                         | [M-H]-     | Organic oxygen compounds                |
| 489 | 5.485 | 429.2069 | Majdine                                                                                                                                                                                    | [M+H]+     | Organoheterocyclic compounds            |
| 490 | 5.494 | 379.1355 | xi-3-Hydroxy-5-phenylpentanoic acid O-beta-D-Glucopyranoside                                                                                                                               | [M+Na]+    | Lipids and lipid-like molecules         |
| 491 | 5.519 | 197.1531 | Neryl acetate                                                                                                                                                                              | [M+H]+     | Lipids and lipid-like molecules         |
| 492 | 5.524 | 271.0895 | (+)-Dihydrokawain-5-ol                                                                                                                                                                     | [M+Na]+    | Phenylpropanoids and polyketides        |
| 493 | 5.554 | 202.1101 | N-(3-Methylbut-2-EN-1-YL)-9H-purin-6-amine                                                                                                                                                 | [M-H]-     | Organoheterocyclic compounds            |
| 494 | 5.584 | 441.2451 | N-Methyl-N-[(2E,4E,6E)-2,4,6-octatrienoyl]valylalanylprolinamide                                                                                                                           | [M+Na]+    | Organic acids and derivatives           |
| 495 | 5.59  | 401.2051 | Reserpine acid                                                                                                                                                                             | [M+H]+     | Alkaloids and derivatives               |
| 496 | 5.594 | 353.1546 | (2,6,6-Trimethyl-4-oxo-2-cyclohexen-1-yl)methyl beta-D-glucopyranoside                                                                                                                     | [M+Na]+    | Organic oxygen compounds                |
| 497 | 5.641 | 408.2719 | Isotalatizidine                                                                                                                                                                            | [M+H]+     | Lipids and lipid-like molecules         |
| 498 | 5.659 | 397.2181 | 3,5,5-Trimethyl-4-[3-[(beta-D-glucopyranosyl)oxy]butyl]-3-cyclohexen-1-ol                                                                                                                  | [M+Na]+    | Lipids and lipid-like molecules         |
| 499 | 5.689 | 289.1545 | Indole-3-acetyl-L-leucine                                                                                                                                                                  | [M+H]+     | Organic acids and derivatives           |
| 500 | 5.696 | 295.1504 | 11-(Phenylcarbonyl)-7,11-diazatricyclo[7.3.1.0<2,7>]trideca-2,4-dien-6-one                                                                                                                 | [M+H]+     | Organoheterocyclic compounds            |
| 501 | 5.698 | 148.074  | 3-Methyloxindole                                                                                                                                                                           | [M+H]+     | Organoheterocyclic compounds            |
| 502 | 5.832 | 343.2119 | FA 18:2;4O                                                                                                                                                                                 | [M-H]-     | Lipids and lipid-like molecules         |
| 503 | 5.832 | 201.112  | Sebacic acid                                                                                                                                                                               | [M-H]-     | Lipids and lipid-like molecules         |
| 504 | 5.851 | 117.0542 | 3-Methyl-2-oxobutanoic acid                                                                                                                                                                | [M+H]+     | Organic acids and derivatives           |
| 505 | 5.903 | 233.1529 | Atractylenolide II                                                                                                                                                                         | [M+H]+     | Undefined                               |

|     |       |          |                                                                                                                                         |                                                                  |                                           |
|-----|-------|----------|-----------------------------------------------------------------------------------------------------------------------------------------|------------------------------------------------------------------|-------------------------------------------|
| 506 | 5.913 | 423.2342 | Bonactin                                                                                                                                | [M+Na] <sup>+</sup>                                              | Organic acids and derivatives             |
| 507 | 6.003 | 353.1383 | 3-(4-Hydroxyphenyl)propanoic acid 3-(4-hydroxy-3-methoxyphenyl)propyl ester                                                             | [M+Na] <sup>+</sup>                                              | Benzenoids                                |
| 508 | 6.015 | 590.3046 | Benzoylmesaconine                                                                                                                       | [M+H] <sup>+</sup>                                               | Undefined                                 |
| 509 | 6.028 | 403.1387 | Methyl 2-(4,5-dihydroxy-6-methoxy-3,6-dimethyl-2-oxocyclohex-3-en-1-yl)oxy-4-hydroxy-3,6-dimethylbenzoate                               | [M+Na] <sup>+</sup>                                              | Benzenoids                                |
| 510 | 6.053 | 399.2364 | Mitragynine                                                                                                                             | [M+H] <sup>+</sup>                                               | Alkaloids and derivatives                 |
| 511 | 6.078 | 229.1439 | Dodecanedioic acid                                                                                                                      | [M-C <sub>6</sub> H <sub>8</sub> O <sub>6</sub> -H] <sup>-</sup> | Lipids and lipid-like molecules           |
| 512 | 6.111 | 327.2161 | 9,12,13-Trihydroxyoctadeca-10,15-dienoic acid                                                                                           | [M-H] <sup>-</sup>                                               | Lipids and lipid-like molecules           |
| 513 | 6.141 | 267.1549 | Sambucinol                                                                                                                              | [M+H] <sup>+</sup>                                               | Organoheterocyclic compounds              |
| 514 | 6.152 | 471.2184 | (6,6-Dimethylbicyclo[3.1.1]hept-2-yl)methyl 6-O-[(2R,3R,4R)-3,4-dihydroxy-4-(hydroxymethyl)tetrahydro-2-furanyl]-beta-D-glucopyranoside | [M+Na] <sup>+</sup>                                              | Lipids and lipid-like molecules           |
| 515 | 6.159 | 273.0416 | 2-Phenyl-3H-benzimidazol-1-ium-5-sulfonate                                                                                              | [M-H] <sup>-</sup>                                               | Organoheterocyclic compounds              |
| 516 | 6.164 | 285.0405 | Kaempferol                                                                                                                              | [M-H] <sup>-</sup>                                               | Phenylpropanoids and polyketides          |
| 517 | 6.166 | 255.0278 | Purpurin                                                                                                                                | [M-H] <sup>-</sup>                                               | Benzenoids                                |
| 518 | 6.196 | 341.1945 | Pentamidine                                                                                                                             | [M+H] <sup>+</sup>                                               | Benzenoids                                |
| 519 | 6.198 | 281.1736 | Brefeldin A                                                                                                                             | [M+H] <sup>+</sup>                                               | Phenylpropanoids and polyketides          |
| 520 | 6.207 | 421.2183 | 2-[5-[2-[2-[5-(2-Oxopropyl)oxolan-2-yl]propanoyloxy]butyl]oxolan-2-yl]propanoic acid                                                    | [M+Na] <sup>+</sup>                                              | Organic acids and derivatives             |
| 521 | 6.222 | 249.194  | Matrine                                                                                                                                 | [M+H] <sup>+</sup>                                               | Alkaloids and derivatives                 |
| 522 | 6.222 | 249.1496 | Pterosin A                                                                                                                              | [M+H] <sup>+</sup>                                               | Benzenoids                                |
| 523 | 6.237 | 269.0472 | Apigenin                                                                                                                                | [M-H] <sup>-</sup>                                               | Phenylpropanoids and polyketides          |
| 524 | 6.259 | 427.1711 | Fragransin B2                                                                                                                           | [M+Na] <sup>+</sup>                                              | Lignans, neolignans and related compounds |
| 525 | 6.26  | 299.18   | Roquefortine A                                                                                                                          | [M+H] <sup>+</sup>                                               | Alkaloids and derivatives                 |
| 526 | 6.273 | 409.1809 | 4-[4-(beta-D-Glucopyranosyloxy)-2-hydroxy-2,6,6-trimethylcyclohexylidene]-3-buten-2-one                                                 | [M+Na] <sup>+</sup>                                              | Lipids and lipid-like molecules           |
| 527 | 6.325 | 113.0594 | 1,4-Cyclohexanedione                                                                                                                    | [M+H] <sup>+</sup>                                               | Organic oxygen compounds                  |
| 528 | 6.328 | 305.1722 | Zeranol                                                                                                                                 | [M-H <sub>2</sub> O+H] <sup>+</sup>                              | Phenylpropanoids and polyketides          |
| 529 | 6.395 | 214.1789 | N-(9-Oxodecyl)acetamide                                                                                                                 | [M+H] <sup>+</sup>                                               | Organic acids and derivatives             |
| 530 | 6.397 | 399.1773 | 8-Hydroxy-2,7,7,11,15-pentamethyl-5,12,16-trioxapentacyclo[9.8.0.0(2),.0,.0(1)(3),(1)]nonadec-13(18)-ene-3,17-dione                     | [M+Na] <sup>+</sup>                                              | Organoheterocyclic compounds              |
| 531 | 6.404 | 367.2453 | Isomuronic acid                                                                                                                         | [M+H] <sup>+</sup>                                               | Organoheterocyclic compounds              |
| 532 | 6.408 | 209.1192 | Jasmonic acid                                                                                                                           | [M-H] <sup>-</sup>                                               | Lipids and lipid-like molecules           |
| 533 | 6.412 | 339.1752 | (+)-18-Hydroxygardnutine                                                                                                                | [M+H] <sup>+</sup>                                               | Alkaloids and derivatives                 |
| 534 | 6.452 | 439.0963 | Daidzin                                                                                                                                 | [M+Na] <sup>+</sup>                                              | Phenylpropanoids and polyketides          |
| 535 | 6.453 | 329.2317 | 9,12,13-Trihydroxyoctadec-10-enoic acid                                                                                                 | [M-H] <sup>-</sup>                                               | Lipids and lipid-like molecules           |

|     |       |          |                                                                                                                     |                                      |                                           |
|-----|-------|----------|---------------------------------------------------------------------------------------------------------------------|--------------------------------------|-------------------------------------------|
| 536 | 6.475 | 352.2443 | Jacobine                                                                                                            | [M+H] <sup>+</sup>                   | Alkaloids and derivatives                 |
| 537 | 6.503 | 192.1376 | Diethyltoluamide                                                                                                    | [M+H] <sup>+</sup>                   | Benzenoids                                |
| 538 | 6.542 | 309.1667 | Vincanidine                                                                                                         | [M+H] <sup>+</sup>                   | Alkaloids and derivatives                 |
| 539 | 6.543 | 435.2126 | 4-[(2R,3R,4S,5S,6R)-3,4,5-trihydroxy-6-(hydroxymethyl)oxan-2-yl]oxypentan-2-yl (E)-3-(4-hydroxyphenyl)prop-2-enoate | [M-H] <sup>-</sup>                   | Lipids and lipid-like molecules           |
| 540 | 6.561 | 337.196  | Tabersonine                                                                                                         | [M+H] <sup>+</sup>                   | Alkaloids and derivatives                 |
| 541 | 6.596 | 315.1104 | Pyraclonil                                                                                                          | [M+H] <sup>+</sup>                   | Organic nitrogen compounds                |
| 542 | 6.596 | 207.1355 | Dexibuprofen                                                                                                        | [M+H] <sup>+</sup>                   | Phenylpropanoids and polyketides          |
| 543 | 6.643 | 289.1786 | 12-Hydroxy-13-(hydroxymethyl)-3,5,7-trimethyl-2,4-tetradecadienedioic acid                                          | [M-3H <sub>2</sub> O+H] <sup>+</sup> | Lipids and lipid-like molecules           |
| 544 | 6.7   | 163.1096 | Valerophenone                                                                                                       | [M+H] <sup>+</sup>                   | Organic oxygen compounds                  |
| 545 | 6.736 | 323.1812 | Gelsemine                                                                                                           | [M+H] <sup>+</sup>                   | Alkaloids and derivatives                 |
| 546 | 6.741 | 428.078  | SMZ-PtO                                                                                                             | [M-H] <sup>-</sup>                   | Benzenoids                                |
| 547 | 6.749 | 341.1921 | Yohimbic Acid                                                                                                       | [M+H] <sup>+</sup>                   | Alkaloids and derivatives                 |
| 548 | 6.755 | 327.2181 | Corchorifatty acid F                                                                                                | [M-H] <sup>-</sup>                   | Lipids and lipid-like molecules           |
| 549 | 6.796 | 325.202  | FA 18:3;3O                                                                                                          | [M-H] <sup>-</sup>                   | Lipids and lipid-like molecules           |
| 550 | 6.815 | 623.3127 | Tetrandrine                                                                                                         | [M+H] <sup>+</sup>                   | Lignans, neolignans and related compounds |
| 551 | 6.823 | 395.1982 | Brucine                                                                                                             | [M+H] <sup>+</sup>                   | Alkaloids and derivatives                 |
| 552 | 6.83  | 266.1715 | Mirtazapine                                                                                                         | [M+H] <sup>+</sup>                   | Organoheterocyclic compounds              |
| 553 | 6.842 | 350.1569 | Erucifoline                                                                                                         | [M+H] <sup>+</sup>                   | Alkaloids and derivatives                 |
| 554 | 6.845 | 367.2068 | Hirsuteine                                                                                                          | [M+H] <sup>+</sup>                   | Alkaloids and derivatives                 |
| 555 | 6.848 | 209.1499 | 5-(6-Methyl-6-hydroxyoctyl)furan-2(5H)-one                                                                          | [M-H <sub>2</sub> O+H] <sup>+</sup>  | Organoheterocyclic compounds              |
| 556 | 6.852 | 343.2116 | 9-Hydroxy-11-[3-hydroxy-5-(1-hydroxypropyl)oxolan-2-yl]undec-10-enoic acid                                          | [M-H] <sup>-</sup>                   | Lipids and lipid-like molecules           |
| 557 | 6.868 | 335.1802 | Strychnine sulfate                                                                                                  | [M+H] <sup>+</sup>                   | Undefined                                 |
| 558 | 6.876 | 322.1997 | Toxin HT 2                                                                                                          | [M-H] <sup>-</sup>                   | Lipids and lipid-like molecules           |
| 559 | 6.898 | 369.1617 | (2S)-8-[(E)-3-Hydroxy-3-methylbut-1-enyl]-5,7-dimethoxy-2-phenyl-2,3-dihydrochromen-4-one                           | [M+H] <sup>+</sup>                   | Phenylpropanoids and polyketides          |
| 560 | 6.907 | 193.0877 | Butylparaben                                                                                                        | [M-H] <sup>-</sup>                   | Benzenoids                                |
| 561 | 6.907 | 313.0347 | Wedelolactone                                                                                                       | [M-H] <sup>-</sup>                   | Phenylpropanoids and polyketides          |
| 562 | 6.912 | 585.3193 | Lappaconitine hydrobromide                                                                                          | [M+H] <sup>+</sup>                   | Undefined                                 |
| 563 | 6.952 | 213.1493 | 12-Hydroxydodec-3-enoic acid                                                                                        | [M-H] <sup>-</sup>                   | Organic acids and derivatives             |
| 564 | 7.011 | 161.1303 | Trinoranastreptene                                                                                                  | [M+H] <sup>+</sup>                   | Undefined                                 |
| 565 | 7.017 | 279.092  | Triphenylphosphine oxide                                                                                            | [M+H] <sup>+</sup>                   | Benzenoids                                |
| 566 | 7.048 | 361.1972 | Cortisone                                                                                                           | [M+H] <sup>+</sup>                   | Lipids and lipid-like molecules           |
| 567 | 7.079 | 223.1353 | 13-Oxotrideca-9,11-dienoic acid                                                                                     | [M-H] <sup>-</sup>                   | Lipids and lipid-like molecules           |
| 568 | 7.092 | 189.1254 | 2-(1-Phenylethyl)-3,6-Dihydro-2H-Pyran                                                                              | [M+H] <sup>+</sup>                   | Undefined                                 |

|     |       |          |                                                                                                                                   |                                     |                                  |
|-----|-------|----------|-----------------------------------------------------------------------------------------------------------------------------------|-------------------------------------|----------------------------------|
| 569 | 7.099 | 409.2201 | 2-[5-[2-[2-[5-(2-Hydroxypropyl)oxolan-2-yl]propanoyloxy]propyl]oxolan-2-yl]propanoic acid                                         | [M+Na] <sup>+</sup>                 | Organic acids and derivatives    |
| 570 | 7.12  | 363.2142 | Hydrocortisone                                                                                                                    | [M+H] <sup>+</sup>                  | Lipids and lipid-like molecules  |
| 571 | 7.131 | 376.2551 | 7''-ethyl-6-methyl-4'',7''-dihydro-3''H-dispiro[oxane-2,6'-[7,9,12]triazatricyclo[6.3.1.04,12]dodecane-10',2''-oxepin]-8'-en-3-ol | [M+H] <sup>+</sup>                  | Undefined                        |
| 572 | 7.149 | 373.1679 | 1,7-Bis(3,4-dihydroxyphenyl)heptan-3-yl acetate                                                                                   | [M-H] <sup>-</sup>                  | Phenylpropanoids and polyketides |
| 573 | 7.158 | 202.2152 | 1-Decanamine, N,N-dimethyl-, N-oxide                                                                                              | [M+H] <sup>+</sup>                  | Organic nitrogen compounds       |
| 574 | 7.179 | 381.2038 | 4-Hydroxy-3-[(2E,6E)-4-hydroxy-3,7,11-trimethyldodeca-2,6,10-trienyl]benzoic acid                                                 | [M+Na] <sup>+</sup>                 | Lipids and lipid-like molecules  |
| 575 | 7.188 | 316.1872 | (E)-Piperolein A                                                                                                                  | [M+H] <sup>+</sup>                  | Organoheterocyclic compounds     |
| 576 | 7.204 | 275.1978 | 9s,13r-12-Oxophytodienoic Acid                                                                                                    | [M-H <sub>2</sub> O+H] <sup>+</sup> | Lipids and lipid-like molecules  |
| 577 | 7.223 | 121.0637 | Phenylacetaldehyde                                                                                                                | [M+H] <sup>+</sup>                  | Benzenoids                       |
| 578 | 7.223 | 195.1363 | 5-(6-Methyl-6-hydroxyheptyl)furan-2(5H)-one                                                                                       | [M-H <sub>2</sub> O+H] <sup>+</sup> | Organoheterocyclic compounds     |
| 579 | 7.224 | 127.0375 | Phloroglucinol                                                                                                                    | [M+H] <sup>+</sup>                  | Benzenoids                       |
| 580 | 7.225 | 425.1321 | 8-(2,3-Dihydroxy-3-methylbutyl)-5,7-dimethoxy-2-phenyl-2,3-dihydrochromen-4-one                                                   | [M+K] <sup>+</sup>                  | Phenylpropanoids and polyketides |
| 581 | 7.229 | 373.1931 | 3,4-Dihydro-6,8-dihydroxy-3-(10-hydroxyundecyl)isocoumarin                                                                        | [M+Na] <sup>+</sup>                 | Benzenoids                       |
| 582 | 7.23  | 311.2178 | (5S,6E,8S,9Z,13S,14R)-5-Hydroxy-8-methoxy-5,9,13,14-tetramethyl-1-oxacyclotetradeca-6,9-dien-2-one                                | [M+H] <sup>+</sup>                  | Phenylpropanoids and polyketides |
| 583 | 7.235 | 351.2134 | Vinpocetine                                                                                                                       | [M+H] <sup>+</sup>                  | Alkaloids and derivatives        |
| 584 | 7.24  | 183.078  | Atractylodin                                                                                                                      | [M+H] <sup>+</sup>                  | Undefined                        |
| 585 | 7.249 | 249.1432 | Parthenolide                                                                                                                      | [M+H] <sup>+</sup>                  | Lipids and lipid-like molecules  |
| 586 | 7.257 | 297.3147 | Phytol                                                                                                                            | [M+H] <sup>+</sup>                  | Lipids and lipid-like molecules  |
| 587 | 7.259 | 264.1931 | Dendrobine                                                                                                                        | [M+H] <sup>+</sup>                  | Undefined                        |
| 588 | 7.274 | 181.121  | Jasmolone                                                                                                                         | [M+H] <sup>+</sup>                  | Undefined                        |
| 589 | 7.276 | 383.1822 | 2-[1-(1H-Benzimidazol-2-yl)-3-(2-methoxyphenyl)propan-2-yl]-1H-benzimidazole                                                      | [M+H] <sup>+</sup>                  | Organoheterocyclic compounds     |
| 590 | 7.295 | 329.2323 | (Z)-5,8,11-Trihydroxyoctadec-9-enoic acid                                                                                         | [M-H] <sup>-</sup>                  | Lipids and lipid-like molecules  |
| 591 | 7.297 | 353.2287 | (15Z)-9,12,13-Trihydroxy-15-octadecenoic acid                                                                                     | [M+Na] <sup>+</sup>                 | Lipids and lipid-like molecules  |
| 592 | 7.318 | 637.3721 | Decahydrogamibogic acid                                                                                                           | [M-H] <sup>-</sup>                  | Organoheterocyclic compounds     |
| 593 | 7.319 | 130.0629 | Indole-3-carbinol                                                                                                                 | [M+H-H <sub>2</sub> O] <sup>+</sup> | Organoheterocyclic compounds     |
| 594 | 7.342 | 403.133  | Hexamethylquercetaetin                                                                                                            | [M+H] <sup>+</sup>                  | Phenylpropanoids and polyketides |
| 595 | 7.353 | 271.1682 | Trenbolone                                                                                                                        | [M+H] <sup>+</sup>                  | Lipids and lipid-like molecules  |
| 596 | 7.355 | 229.1414 | 9-(Methoxycarbonyl)dec-9-enoic acid                                                                                               | [M+H] <sup>+</sup>                  | Lipids and lipid-like molecules  |
| 597 | 7.367 | 327.0069 | Tris(1-chloro-2-propyl)phosphate                                                                                                  | [M+H] <sup>+</sup>                  | Organic acids and derivatives    |

|     |       |          |                                                                                                                                                                 |                         |                                  |
|-----|-------|----------|-----------------------------------------------------------------------------------------------------------------------------------------------------------------|-------------------------|----------------------------------|
| 598 | 7.429 | 427.2088 | 1'(2'H)-Naphthalene]-7-carboxaldehyde, 3',4',4'a,5',6',7',8',8'a-octahydro-4,6',7'-trihydroxy-6-(hydroxymethyl)-2',5',5',8'a-tetramethyl-spiro[benzofuran-2(3H) | [M+Na]+                 | Organoheterocyclic compounds     |
| 599 | 7.438 | 271.0973 | (2r)-1-(2,4-Dihydroxyphenyl)-2-(4-methoxyphenyl)propan-1-one                                                                                                    | [M-H]-                  | Phenylpropanoids and polyketides |
| 600 | 7.466 | 291.1954 | FA 18:4;O                                                                                                                                                       | [M-H]-                  | Lipids and lipid-like molecules  |
| 601 | 7.48  | 307.1925 | 16-Hydroxy-9-oxooctadeca-10,12,14-trienoic acid                                                                                                                 | [M-H]-                  | Lipids and lipid-like molecules  |
| 602 | 7.529 | 437.091  | (5-Benzoyloxy-4,6-dihydroxy-3-methoxycyclohexen-1-yl)methyl benzoate                                                                                            | [M+K]+                  | Benzenoids                       |
| 603 | 7.535 | 265.1791 | Koninginin E                                                                                                                                                    | [M-H <sub>2</sub> O+H]+ | Organoheterocyclic compounds     |
| 604 | 7.536 | 925.5025 | Saikosaponin C                                                                                                                                                  | [M-H]-                  | Undefined                        |
| 605 | 7.539 | 293.1752 | Gingerol                                                                                                                                                        | [M-H]-                  | Benzenoids                       |
| 606 | 7.539 | 609.3427 | Kaempferol 3,7-diglucoside                                                                                                                                      | [M-H]-                  | Phenylpropanoids and polyketides |
| 607 | 7.565 | 376.2437 | Tuberostemonine                                                                                                                                                 | [M+H]+                  | Undefined                        |
| 608 | 7.565 | 329.2328 | FA 18:1;3O                                                                                                                                                      | [M-H]-                  | Lipids and lipid-like molecules  |
| 609 | 7.584 | 239.0669 | Dinoterb                                                                                                                                                        | [M-H]-                  | Benzenoids                       |
| 610 | 7.627 | 153.1257 | (1S,4R)-(+)-Fenchone                                                                                                                                            | [M+H]+                  | Lipids and lipid-like molecules  |
| 611 | 7.628 | 291.1953 | 8-(2-Oxo-5-pent-2-enylcyclopent-3-en-1-yl)octanoic acid                                                                                                         | [M-H]-                  | Lipids and lipid-like molecules  |
| 612 | 7.663 | 235.1675 | 2-(8-Hydroxy-4a,8-dimethyldecahydro-2-naphthalenyl)acrylic acid                                                                                                 | [M-H <sub>2</sub> O+H]+ | Lipids and lipid-like molecules  |
| 613 | 7.683 | 415.2107 | (1S,2R,4aR,8aR)-1-Acetoxy-7-isopropylidene-1,4a-dimethyl-6-oxodecahydro-2-naphthalenyl 2,3-dimethyl-2-oxiranecarboxylate                                        | [M+Na]+                 | Lipids and lipid-like molecules  |
| 614 | 7.722 | 353.1888 | Ajmalicine                                                                                                                                                      | [M+H]+                  | Alkaloids and derivatives        |
| 615 | 7.722 | 411.1814 | Isoapetalic acid                                                                                                                                                | [M+Na]+                 | Organoheterocyclic compounds     |
| 616 | 7.723 | 378.2587 | Karakoline                                                                                                                                                      | [M+H]+                  | Lipids and lipid-like molecules  |
| 617 | 7.73  | 353.17   | Candidone                                                                                                                                                       | [M+H]+                  | Phenylpropanoids and polyketides |
| 618 | 7.735 | 291.1941 | h_92_Oxabolone                                                                                                                                                  | [M+H]+                  | Lipids and lipid-like molecules  |
| 619 | 7.777 | 387.2096 | Sufentanil                                                                                                                                                      | [M+H]+                  | Benzenoids                       |
| 620 | 7.79  | 153.1259 | p-Menth-4(8)-en-3-one                                                                                                                                           | [M+H]+                  | Lipids and lipid-like molecules  |
| 621 | 7.87  | 174.0543 | Deisopropylatrazine                                                                                                                                             | [M+H]+                  | Organoheterocyclic compounds     |
| 622 | 7.876 | 309.207  | 9-Hydroperoxy-, (Z,Z,Z)-10,12,15-octadecatrienoic acid                                                                                                          | [M-H]-                  | Lipids and lipid-like molecules  |
| 623 | 7.877 | 423.2098 | Fludrocortisone acetate                                                                                                                                         | [M+H]+                  | Lipids and lipid-like molecules  |
| 624 | 7.893 | 373.1285 | Tangeretin                                                                                                                                                      | [M+H]+                  | Phenylpropanoids and polyketides |
| 625 | 7.914 | 194.0824 | L-beta-Homotyrosine                                                                                                                                             | [M-H]-                  | Organic acids and derivatives    |
| 626 | 7.929 | 251.1697 | 2-[(1S,2S,4aR,8aS)-1-Hydroxy-4a-methyl-8-methylenedeca-2-hydro-2-naphthalenyl]acrylic acid                                                                      | [M+H]+                  | Lipids and lipid-like molecules  |
| 627 | 7.982 | 285.1155 | Loureirin A                                                                                                                                                     | [M-H]-                  | Undefined                        |
| 628 | 8.03  | 432.2353 | [1,14-Dihydroxy-8-(hydroxymethyl)-4,12,12,15-tetramethyl-5-oxo-13-tetracyclo[8.5.0.0.2,6.0.11,13]pentadeca-3,8-dienyl] acetate                                  | [M+ACN+H]+              | Lipids and lipid-like molecules  |

|     |       |          |                                                                                                                                               |                                      |                                           |
|-----|-------|----------|-----------------------------------------------------------------------------------------------------------------------------------------------|--------------------------------------|-------------------------------------------|
| 629 | 8.031 | 437.1903 | Methyl 3-[(1E,3E)-3,5-dimethyl-1,3-heptadien-1-yl]-8-hydroxy-6a,8-dimethyl-6-oxo-6a,8,9,9a-tetrahydro-6H-furo[2,3-h]isochromene-9-carboxylate | [M+Na] <sup>+</sup>                  | Organic oxygen compounds                  |
| 630 | 8.032 | 133.0641 | Cinnamaldehyde                                                                                                                                | [M+H] <sup>+</sup>                   | Phenylpropanoids and polyketides          |
| 631 | 8.035 | 293.2129 | 8-hydroxyoctadeca-9,12,15-trienoic acid                                                                                                       | [M-H] <sup>-</sup>                   | Lipids and lipid-like molecules           |
| 632 | 8.037 | 253.1761 | Wallemine                                                                                                                                     | [M+H] <sup>+</sup>                   | Lipids and lipid-like molecules           |
| 633 | 8.047 | 151.1124 | Perillene                                                                                                                                     | [M+H] <sup>+</sup>                   | Undefined                                 |
| 634 | 8.049 | 175.1447 | 4-(2,3,6-trimethylphenyl)butan-2-ol                                                                                                           | [M+H-H <sub>2</sub> O] <sup>+</sup>  | Undefined                                 |
| 635 | 8.09  | 311.22   | 9-HPODE                                                                                                                                       | [M-H] <sup>-</sup>                   | Undefined                                 |
| 636 | 8.12  | 353.229  | Anileridine                                                                                                                                   | [M+H] <sup>+</sup>                   | Organoheterocyclic compounds              |
| 637 | 8.179 | 278.2077 | Venlafaxine                                                                                                                                   | [M+H] <sup>+</sup>                   | Benzenoids                                |
| 638 | 8.224 | 535.2888 | Tenuigenin                                                                                                                                    | [M-H] <sup>-</sup>                   | Undefined                                 |
| 639 | 8.236 | 321.1681 | 8-(3-((2-Carboxypropan-2-yl)oxy)phenyl)octanoic acid                                                                                          | [M-H] <sup>-</sup>                   | Benzenoids                                |
| 640 | 8.254 | 237.182  | Curcumol                                                                                                                                      | [M+H] <sup>+</sup>                   | Undefined                                 |
| 641 | 8.257 | 407.222  | Lincomycine                                                                                                                                   | [M+H] <sup>+</sup>                   | Organic acids and derivatives             |
| 642 | 8.259 | 357.267  | Dinoprost                                                                                                                                     | [M-H] <sup>1-</sup>                  | Lipids and lipid-like molecules           |
| 643 | 8.29  | 219.1742 | 5-hydroxyculmorin                                                                                                                             | [M-2H <sub>2</sub> O+H] <sup>+</sup> | Lipids and lipid-like molecules           |
| 644 | 8.305 | 349.1758 | Enalaprilat                                                                                                                                   | [M+H] <sup>+</sup>                   | Organic acids and derivatives             |
| 645 | 8.313 | 293.2099 | 8-[3-Oxo-2-[(E)-pent-2-enyl]cyclopenten-1-yl]octanoic acid                                                                                    | [M+H] <sup>+</sup>                   | Lipids and lipid-like molecules           |
| 646 | 8.323 | 448.1982 | Oxaline                                                                                                                                       | [M+H] <sup>+</sup>                   | Organoheterocyclic compounds              |
| 647 | 8.326 | 318.299  | 2-Aminooctadecane-1,3,4-triol                                                                                                                 | [M+H] <sup>+</sup>                   | Organic nitrogen compounds                |
| 648 | 8.332 | 415.2124 | 6-[3-[(3,4-Dimethoxyphenyl)methyl]-4-methoxy-2-(methoxymethyl)butyl]-4-methoxy-1,3-benzodioxole                                               | [M-H <sub>2</sub> O+H] <sup>+</sup>  | Lignans, neolignans and related compounds |
| 649 | 8.35  | 553.296  | (all-E)-beta-Cryptoxanthin                                                                                                                    | [M+H] <sup>+</sup>                   | Lipids and lipid-like molecules           |
| 650 | 8.404 | 303.1366 | 4-[Formyl(6-methoxyquinolin-8-yl)amino]pentanoic acid                                                                                         | [M+H] <sup>+</sup>                   | Organoheterocyclic compounds              |
| 651 | 8.409 | 313.2351 | (9Z,12E)-15,16-Dihydroxyoctadeca-9,12-dienoic acid                                                                                            | [M+H] <sup>+</sup>                   | Lipids and lipid-like molecules           |
| 652 | 8.414 | 357.2014 | Fibleucin                                                                                                                                     | [M+H] <sup>+</sup>                   | Organoheterocyclic compounds              |
| 653 | 8.416 | 214.2515 | N,N-Dimethyldodecylamine                                                                                                                      | [M+H] <sup>+</sup>                   | Organic nitrogen compounds                |
| 654 | 8.431 | 428.8873 | Tris(1,3-dichloro-2-propyl)phosphate                                                                                                          | [M+H] <sup>+</sup>                   | Organic acids and derivatives             |
| 655 | 8.471 | 313.2379 | 12,13-Dihydroxyoctadec-9-enoic acid                                                                                                           | [M-H] <sup>-</sup>                   | Lipids and lipid-like molecules           |
| 656 | 8.475 | 358.2336 | Songorine                                                                                                                                     | [M+H] <sup>+</sup>                   | Lipids and lipid-like molecules           |
| 657 | 8.498 | 200.2363 | N-Methyldodecylamine                                                                                                                          | [M+H] <sup>+</sup>                   | Organic nitrogen compounds                |
| 658 | 8.524 | 327.0759 | Triphenyl phosphate                                                                                                                           | [M+H] <sup>+</sup>                   | Organic acids and derivatives             |
| 659 | 8.528 | 309.2044 | Albocycline                                                                                                                                   | [M+H] <sup>+</sup>                   | Phenylpropanoids and polyketides          |
| 660 | 8.556 | 465.28   | 4-[3-Methyl-5-(5,6,7-trihydroxy-1,2,4a,5-tetramethyl-3,4,6,7,8,8a-hexahydro-2H-naphthalen-1-yl)pentoxy]-4-oxobutanoic acid                    | [M+Na] <sup>+</sup>                  | Lipids and lipid-like molecules           |
| 661 | 8.575 | 277.1791 | Tetradecane-7-sulfonic acid                                                                                                                   | [M-H] <sup>-</sup>                   | Organic acids and derivatives             |

|     |       |          |                                                                                                                       |                                     |                                  |
|-----|-------|----------|-----------------------------------------------------------------------------------------------------------------------|-------------------------------------|----------------------------------|
| 662 | 8.578 | 237.0776 | 5,6,7-Trimethoxycoumarin                                                                                              | [M+H] <sup>+</sup>                  | Phenylpropanoids and polyketides |
| 663 | 8.586 | 309.2082 | FA 18:3;2O                                                                                                            | [M-H] <sup>-</sup>                  | Lipids and lipid-like molecules  |
| 664 | 8.607 | 347.2174 | Corticosterone                                                                                                        | [M+H] <sup>+</sup>                  | Lipids and lipid-like molecules  |
| 665 | 8.616 | 277.1812 | 1,8-dimethyl-6-oxo-7-(propan-2-ylidene)-2,3,4,8-tetrahydro-1H-naphthalen-2-ylacetate                                  | [M+H] <sup>+</sup>                  | Undefined                        |
| 666 | 8.643 | 311.2218 | 9-Hydroperoxyoctadeca-10,12-dienoic acid                                                                              | [M-H] <sup>-</sup>                  | Lipids and lipid-like molecules  |
| 667 | 8.686 | 251.1995 | Clareolide                                                                                                            | [M+H] <sup>+</sup>                  | Undefined                        |
| 668 | 8.703 | 349.2369 | (5beta,8alpha,9beta,10alpha,13alpha)-18-Methoxy-18-oxokauran-17-oic acid                                              | [M+H] <sup>+</sup>                  | Lipids and lipid-like molecules  |
| 669 | 8.707 | 487.34   | Asiatic acid                                                                                                          | [M-H] <sup>-</sup>                  | Undefined                        |
| 670 | 8.759 | 481.2563 | Decaethylene glycol                                                                                                   | [M+Na] <sup>+</sup>                 | Organic oxygen compounds         |
| 671 | 8.775 | 359.2147 | (2E,6E,10Z)-12-Hydroxy-10-(hydroxymethyl)-6-methyl-2-(4-methylpent-3-enyl)dodeca-2,6,10-trienoic acid                 | [M+Na] <sup>+</sup>                 | Lipids and lipid-like molecules  |
| 672 | 8.778 | 343.2921 | Lauramidopropylbetaine                                                                                                | [M] <sup>+</sup>                    | Organic acids and derivatives    |
| 673 | 8.779 | 311.2552 | Avocadoene 2-acetate                                                                                                  | [M-H <sub>2</sub> O+H] <sup>+</sup> | Lipids and lipid-like molecules  |
| 674 | 8.802 | 360.248  | Napelline                                                                                                             | [M+H] <sup>+</sup>                  | Lipids and lipid-like molecules  |
| 675 | 8.807 | 369.2193 | Hirsutine                                                                                                             | [M+H] <sup>+</sup>                  | Undefined                        |
| 676 | 8.819 | 316.2831 | 2-Aminooctadec-8-ene-1,3,4-triol                                                                                      | [M+H] <sup>+</sup>                  | Organic nitrogen compounds       |
| 677 | 8.82  | 407.2783 | Cholic acid                                                                                                           | [M-H] <sup>-</sup>                  | Lipids and lipid-like molecules  |
| 678 | 8.842 | 230.2463 | N,N-Dimethyldodecylamine N-oxide                                                                                      | [M+H] <sup>+</sup>                  | Organic nitrogen compounds       |
| 679 | 8.85  | 304.2999 | Benzododecinium                                                                                                       | [M] <sup>+</sup>                    | Benzenoids                       |
| 680 | 8.878 | 318.24   | Drofenine                                                                                                             | [M+H] <sup>+</sup>                  | Benzenoids                       |
| 681 | 8.926 | 263.1989 | (1R,2R,4aS,8aS)-2-[(2R)-2-Hydroxybutyl]-1,3-dimethyl-1,2,4a,5,6,7,8,8a-octahydro-1-naphthalenecarboxylic acid         | [M-H <sub>2</sub> O+H] <sup>+</sup> | Organic oxygen compounds         |
| 682 | 8.984 | 269.0455 | Emodin                                                                                                                | [M-H] <sup>-</sup>                  | Benzenoids                       |
| 683 | 9.002 | 223.0946 | Diethyl phthalate                                                                                                     | [M+H] <sup>+</sup>                  | Benzenoids                       |
| 684 | 9.005 | 313.237  | FA 18:1;2O                                                                                                            | [M-H] <sup>-</sup>                  | Lipids and lipid-like molecules  |
| 685 | 9.023 | 351.2513 | Avocadoene 4-acetate                                                                                                  | [M+Na] <sup>+</sup>                 | Lipids and lipid-like molecules  |
| 686 | 9.026 | 327.2103 | Ajmaline                                                                                                              | [M+H] <sup>+</sup>                  | Alkaloids and derivatives        |
| 687 | 9.039 | 293.212  | 14-(3-Ethylloxiran-2-yl)tetradeca-9,12-dienoic acid                                                                   | [M-H] <sup>-</sup>                  | Lipids and lipid-like molecules  |
| 688 | 9.047 | 272.2568 | N-(2-Hydroxyethyl)tetradecanamide                                                                                     | [M+H] <sup>+</sup>                  | Organic nitrogen compounds       |
| 689 | 9.075 | 267.172  | Triisobutyl phosphate                                                                                                 | [M+H] <sup>+</sup>                  | Organic acids and derivatives    |
| 690 | 9.097 | 305.1747 | 9,16-Dioxooctadec-10,12,14-trienoic acid                                                                              | [M-H] <sup>-</sup>                  | Lipids and lipid-like molecules  |
| 691 | 9.1   | 345.1673 | (1R,9R)-3,4,9-Trihydroxy-11,11-dimethyl-5-propan-2-yl-16-oxatetracyclo[6.6.2.0.1,10.0.2,7]hexadeca-2,4,6-trien-15-one | [M-H] <sup>-</sup>                  | Lipids and lipid-like molecules  |
| 692 | 9.103 | 277.1426 | Dibutyl phthalate                                                                                                     | [M-H] <sup>-</sup>                  | Benzenoids                       |
| 693 | 9.116 | 449.2846 | Maritimein                                                                                                            | [M+H] <sup>+</sup>                  | Phenylpropanoids and polyketides |

|     |       |          |                                                                                                                         |                         |                                  |
|-----|-------|----------|-------------------------------------------------------------------------------------------------------------------------|-------------------------|----------------------------------|
| 694 | 9.117 | 315.1946 | Kahweol                                                                                                                 | [M+H] <sup>+</sup>      | Organoheterocyclic compounds     |
| 695 | 9.141 | 275.2026 | FA 18:4                                                                                                                 | [M-H] <sup>-</sup>      | Lipids and lipid-like molecules  |
| 696 | 9.144 | 293.2131 | 9-HOTrE                                                                                                                 | [M-H]1 <sup>-</sup>     | Lipids and lipid-like molecules  |
| 697 | 9.147 | 289.217  | h_61_17_Epioxandrolone                                                                                                  | [M-H2O+H] <sup>+</sup>  | Lipids and lipid-like molecules  |
| 698 | 9.152 | 241.1942 | 19-Norandrosterone                                                                                                      | [M-2H2O+H] <sup>+</sup> | Lipids and lipid-like molecules  |
| 699 | 9.154 | 303.2138 | Aleuritic acid                                                                                                          | [M-H] <sup>-</sup>      | Undefined                        |
| 700 | 9.157 | 309.2055 | 9-Oxo-11-(3-pentylloxiran-2-YL)undec-10-enoic acid                                                                      | [M-H] <sup>-</sup>      | Lipids and lipid-like molecules  |
| 701 | 9.165 | 437.2498 | Nonaethylene glycol                                                                                                     | [M+Na] <sup>+</sup>     | Organic oxygen compounds         |
| 702 | 9.169 | 327.2159 | Hydroquinidine                                                                                                          | [M+H] <sup>+</sup>      | Undefined                        |
| 703 | 9.182 | 328.2449 | (E)-4-[(1R,2S,3S,4R,8As)-2,3,4-trihydroxy-2,5,5,8a-tetramethyl-3,4,4a,6,7,8-hexahydro-1H-naphthalen-1-yl]but-3-en-2-one | [M+NH4] <sup>+</sup>    | Lipids and lipid-like molecules  |
| 704 | 9.183 | 331.1885 | 5-[2-(Furan-3-yl)ethyl]-8-hydroxy-5,6,8a-trimethyl-3,4,4a,6,7,8-hexahydronaphthalene-1-carboxylic acid                  | [M-H] <sup>-</sup>      | Lipids and lipid-like molecules  |
| 705 | 9.215 | 285.2061 | Hexadecanedioic acid                                                                                                    | [M-H2O-H] <sup>-</sup>  | Lipids and lipid-like molecules  |
| 706 | 9.222 | 349.232  | Avocadyne 4-acetate                                                                                                     | [M+Na] <sup>+</sup>     | Lipids and lipid-like molecules  |
| 707 | 9.225 | 371.2386 | Aspidocarpine                                                                                                           | [M+H] <sup>+</sup>      | Alkaloids and derivatives        |
| 708 | 9.229 | 301.1405 | Enterodiol                                                                                                              | [M-H] <sup>-</sup>      | Undefined                        |
| 709 | 9.383 | 402.1562 | Droperidol                                                                                                              | [M+Na] <sup>+</sup>     | Organic oxygen compounds         |
| 710 | 9.391 | 235.1687 | Dihydroartemisinic acid                                                                                                 | [M-H] <sup>-</sup>      | Undefined                        |
| 711 | 9.414 | 419.1795 | (E)-3-(4-Methoxyphenyl)-1-[2,4,6-trimethoxy-3-(3-methylbut-2-enyl)phenyl]prop-2-en-1-one                                | [M+Na] <sup>+</sup>     | Phenylpropanoids and polyketides |
| 712 | 9.431 | 295.2278 | 9-Hydroxy-10E,12Z-octadecadienoic acid                                                                                  | [M-H]1 <sup>-</sup>     | Lipids and lipid-like molecules  |
| 713 | 9.483 | 242.2828 | Dioctylamine                                                                                                            | [M+H] <sup>+</sup>      | Organic nitrogen compounds       |
| 714 | 9.485 | 258.2776 | 1-Tetradecanamine, N,N-dimethyl-, N-oxide                                                                               | [M+H] <sup>+</sup>      | Organic nitrogen compounds       |
| 715 | 9.521 | 293.2132 | 13-HoTrE                                                                                                                | [M-H]1 <sup>-</sup>     | Lipids and lipid-like molecules  |
| 716 | 9.524 | 277.2169 | 3-(2,5-Octadienyl)-oxiraneoctanoic acid                                                                                 | [M+H-H2O] <sup>+</sup>  | Lipids and lipid-like molecules  |
| 717 | 9.536 | 431.2768 | hyocholic acid                                                                                                          | [M+Na] <sup>+</sup>     | Undefined                        |
| 718 | 9.57  | 353.1861 | Humantenine                                                                                                             | [M-H] <sup>-</sup>      | Undefined                        |
| 719 | 9.574 | 341.2054 | (Ent-7α)-7-Hydroxy-8(14),15-pimaradien-19-oic acid                                                                      | [M+Na] <sup>+</sup>     | Lipids and lipid-like molecules  |
| 720 | 9.587 | 319.2248 | Steviol                                                                                                                 | [M+H] <sup>+</sup>      | Lipids and lipid-like molecules  |
| 721 | 9.587 | 137.13   | (-)-α-Terpineol                                                                                                         | [M+H-H2O] <sup>+</sup>  | Lipids and lipid-like molecules  |
| 722 | 9.595 | 375.2873 | [5-(2-Hydroxy-2,5,5,8a-tetramethyl-3,4,4a,6,7,8-hexahydro-1H-naphthalen-1-yl)-3-methylpentyl] acetate                   | [M+Na] <sup>+</sup>     | Lipids and lipid-like molecules  |
| 723 | 9.6   | 419.2723 | Radiclonic acid                                                                                                         | [M+Na] <sup>+</sup>     | Lipids and lipid-like molecules  |
| 724 | 9.613 | 89.05787 | Acetoin                                                                                                                 | [M+NH4] <sup>+</sup>    | Organic oxygen compounds         |
| 725 | 9.627 | 298.2744 | Palmitoleoyl Ethanolamide                                                                                               | [M+H] <sup>+</sup>      | Organic nitrogen compounds       |

|     |        |          |                                                                                                                                          |                                   |                                         |
|-----|--------|----------|------------------------------------------------------------------------------------------------------------------------------------------|-----------------------------------|-----------------------------------------|
| 726 | 9.628  | 163.0373 | Umbelliferone                                                                                                                            | [M+H] <sup>+</sup>                | Phenylpropanoids and polyketides        |
| 727 | 9.629  | 219.1747 | Germacrone                                                                                                                               | [M+H] <sup>+</sup>                | Undefined                               |
| 728 | 9.65   | 417.2582 | Alfentanil                                                                                                                               | [M+H] <sup>+</sup>                | Benzenoids                              |
| 729 | 9.671  | 325.235  | (2S,3S)-4-Methylidene-5-oxo-2-tridecyloxolane-3-carboxylic acid                                                                          | [M+H] <sup>+</sup>                | Organoheterocyclic compounds            |
| 730 | 9.738  | 721.3671 | [2-Hydroxy-3-[3,4,5-trihydroxy-6-[[3,4,5-trihydroxy-6-(hydroxymethyl)oxan-2-yl]oxymethyl]oxan-2-yl]oxypropyl] octadeca-9,12,15-trienoate | [M+HCOO] <sup>-</sup>             | Lipids and lipid-like molecules         |
| 731 | 9.783  | 300.2891 | Sphingosine                                                                                                                              | [M+H] <sup>+</sup>                | Organic nitrogen compounds              |
| 732 | 9.808  | 443.2052 | Trichoverrol A                                                                                                                           | [M+Na] <sup>+</sup>               | Lipids and lipid-like molecules         |
| 733 | 9.808  | 459.1773 | 5-Hydroxy-7-[4-hydroxy-2-methoxy-3-(3-methylbut-2-enyl)phenyl]-2,2-dimethyl-7,8-dihydropyrano[3,2-g]chromen-6-one                        | [M+Na] <sup>+</sup>               | Phenylpropanoids and polyketides        |
| 734 | 9.843  | 343.223  | 5-[(8aS)-2,5,5,8a-tetramethyl-3-oxo-4a,6,7,8-tetrahydro-4H-naphthalen-1-yl]-3-methylpentanoic acid                                       | [M+Na] <sup>+</sup>               | Lipids and lipid-like molecules         |
| 735 | 9.875  | 363.3102 | Tetraethylene glycol monododecyl ether                                                                                                   | [M+H] <sup>+</sup>                | Organic oxygen compounds                |
| 736 | 9.881  | 468.2893 | Lycottonine                                                                                                                              | [M+H] <sup>+</sup>                | Lipids and lipid-like molecules         |
| 737 | 9.888  | 562.3143 | (2-Hydroxy-3-octadeca-9,12,15-trienoyloxypropyl) 2-(trimethylazaniumyl)ethyl phosphate                                                   | [M+HCOO] <sup>-</sup>             | Lipids and lipid-like molecules         |
| 738 | 9.888  | 502.2932 | Phosphatidylcholine lyso 18:3                                                                                                            | [M-CH <sub>3</sub> ] <sup>-</sup> | Lipids and lipid-like molecules         |
| 739 | 9.92   | 243.1951 | 3-Hydroxytetradecanoic acid                                                                                                              | [M-H] <sup>-</sup>                | Lipids and lipid-like molecules         |
| 740 | 9.965  | 318.3001 | Phytosphingosine                                                                                                                         | [M+H] <sup>+</sup>                | Organic nitrogen compounds              |
| 741 | 10.009 | 346.2689 | Himbacine                                                                                                                                | [M+H] <sup>+</sup>                | Organoheterocyclic compounds            |
| 742 | 10.011 | 313.2375 | Octadecanedioic acid                                                                                                                     | [M-H] <sup>-</sup>                | Lipids and lipid-like molecules         |
| 743 | 10.013 | 325.1832 | Dodecylbenzenesulfonic acid                                                                                                              | [M-H] <sup>-</sup>                | Benzenoids                              |
| 744 | 10.02  | 393.1691 | Triamcinolone                                                                                                                            | [M-H] <sup>-</sup>                | Lipids and lipid-like molecules         |
| 745 | 10.021 | 559.3133 | 3-(Hexopyranosyloxy)-2-hydroxypropyl ester, (9Z,12Z,15Z)-9,12,15-octadecatrienoic acid                                                   | [M+FA-H] <sup>-</sup>             | Lipids and lipid-like molecules         |
| 746 | 10.049 | 438.2814 | Neoline/Bullatine B                                                                                                                      | [M+H] <sup>+</sup>                | Undefined                               |
| 747 | 10.052 | 665.2623 | Syrosingopine                                                                                                                            | [M-H] <sup>-</sup>                | Alkaloids and derivatives               |
| 748 | 10.084 | 749.4367 | alpha-Hederin                                                                                                                            | [M-H] <sup>-</sup>                | Undefined                               |
| 749 | 10.089 | 476.2769 | [1-[2-Aminoethoxy(hydroxy)phosphoryl]oxy-3-hydroxypropan-2-yl] octadeca-6,9,12-trienoate                                                 | [M+H] <sup>+</sup>                | Lipids and lipid-like molecules         |
| 750 | 10.103 | 331.2466 | 2'-Deoxyinosine 5'-monophosphate                                                                                                         | [M-H] <sup>-</sup>                | Nucleosides, nucleotides, and analogues |
| 751 | 10.105 | 252.2305 | (2E,4E)-N-(2-Methylpropyl)dodeca-2,4-dienamide                                                                                           | [M+H] <sup>+</sup>                | Lipids and lipid-like molecules         |
| 752 | 10.107 | 413.2638 | 2-Acetoxy-4-pentadecylbenzoic acid                                                                                                       | [M+Na] <sup>+</sup>               | Benzenoids                              |
| 753 | 10.121 | 249.1856 | FA 16:3                                                                                                                                  | [M-H] <sup>-</sup>                | Lipids and lipid-like molecules         |
| 754 | 10.131 | 273.1815 | Galaxolidone                                                                                                                             | [M+H] <sup>+</sup>                | Organoheterocyclic compounds            |
| 755 | 10.152 | 319.2273 | Ginkgolic acid (C13:0)                                                                                                                   | [M-H] <sup>-</sup>                | Undefined                               |

|     |        |          |                                                                                                                              |                |                                         |
|-----|--------|----------|------------------------------------------------------------------------------------------------------------------------------|----------------|-----------------------------------------|
| 756 | 10.162 | 343.2226 | 2-[(2'R,8R,8aS)-2',4,4,7,8a-Pentamethylspiro[2,3,4a,5-tetrahydro-1H-naphthalene-8,5'-oxolane]-2'-yl]acetic acid              | [M+Na]+        | Lipids and lipid-like molecules         |
| 757 | 10.162 | 321.2415 | 5-(1,2,4a,5-Tetramethyl-7-oxo-3,4,8,8a-tetrahydro-2H-naphthalen-1-yl)-3-methylpentanoic acid                                 | [M+H]+         | Lipids and lipid-like molecules         |
| 758 | 10.173 | 413.1769 | Erysubin F                                                                                                                   | [M+Na]+        | Phenylpropanoids and polyketides        |
| 759 | 10.187 | 305.2464 | 13-Hydroxy-7,14-labdadien-6-one                                                                                              | [M+H]+         | Lipids and lipid-like molecules         |
| 760 | 10.189 | 323.2583 | (3S)-5-[(1R,2R,8aS)-2-hydroxy-2,5,5,8a-tetramethyl-3,4,4a,6,7,8-hexahydro-1H-naphthalen-1-yl]-3-methylpentanoic acid         | [M-H]-         | Lipids and lipid-like molecules         |
| 761 | 10.22  | 330.338  | Cyclic AMP                                                                                                                   | [M+H]+         | Nucleosides, nucleotides, and analogues |
| 762 | 10.225 | 313.2359 | (12Z)-9,10-Dihydroxyoctadec-12-enoic acid                                                                                    | [M-C6H10O4-H]- | Lipids and lipid-like molecules         |
| 763 | 10.244 | 344.2555 | Bullatine A                                                                                                                  | [M+H]+         | Undefined                               |
| 764 | 10.257 | 299.2578 | Vernolic acid                                                                                                                | [M-H]1-        | Lipids and lipid-like molecules         |
| 765 | 10.273 | 302.306  | 2-Aminooctadecane-1,3-diol                                                                                                   | [M+H]+         | Organic nitrogen compounds              |
| 766 | 10.274 | 493.3098 | Primulin                                                                                                                     | [M]+           | Phenylpropanoids and polyketides        |
| 767 | 10.294 | 504.3082 | Phosphatidylcholine lyso 18:2                                                                                                | [M-CH3]-       | Lipids and lipid-like molecules         |
| 768 | 10.321 | 476.277  | [3-[2-Aminoethoxy(hydroxy)phosphoryl]oxy-2-hydroxypropyl] octadeca-9,12-dienoate                                             | [M-H]-         | Lipids and lipid-like molecules         |
| 769 | 10.326 | 478.2888 | 4-[5-[[4-[5-[Acetyl(hydroxy)amino]pentylamino]-4-oxobutanoyl]-hydroxyamino]pentylamino]-4-oxobutanoic acid                   | [M+NH4]+       | Lipids and lipid-like molecules         |
| 770 | 10.328 | 555.2839 | Dronedarone                                                                                                                  | [M-H]-         | Organic oxygen compounds                |
| 771 | 10.344 | 297.2433 | 12-Hydroxyoctadec-9-enoic acid                                                                                               | [M-H]-         | Lipids and lipid-like molecules         |
| 772 | 10.348 | 339.1984 | Canrenone                                                                                                                    | [M-H]-         | Lipids and lipid-like molecules         |
| 773 | 10.399 | 375.2508 | 2-Hydroxy-4-methoxy-3,5-bis(3-methylbut-2-enyl)-6-pentylbenzoic acid                                                         | [M+H]+         | Benzenoids                              |
| 774 | 10.405 | 482.3207 | 1-Pentadecanoyl-sn-glycero-3-phosphocholine                                                                                  | [M+H]+         | Lipids and lipid-like molecules         |
| 775 | 10.407 | 356.3508 | N-(2-Hydroxyethyl)icosanamide                                                                                                | [M+H]+         | Organic nitrogen compounds              |
| 776 | 10.409 | 261.2192 | 8-Hydroxy-9,10-epoxystearic acid                                                                                             | [M-3H2O+H]+    | Lipids and lipid-like molecules         |
| 777 | 10.412 | 277.2169 | Linolenic acid                                                                                                               | [M-H]-         | Lipids and lipid-like molecules         |
| 778 | 10.438 | 300.2284 | Dehydroabietamide                                                                                                            | [M+H]+         | Lipids and lipid-like molecules         |
| 779 | 10.45  | 345.2378 | 2-[2-[(1S,8aR)-1,4,4a,5,6,7,8,8a-Octahydro-2-(hydroxymethyl)-5,5,8a-trimethyl-1-naphthalenyl]ethyl]-, (2Z)-2-butene-1,4-diol | [M+Na]+        | Lipids and lipid-like molecules         |
| 780 | 10.455 | 564.3295 | (2-Hydroxy-3-octadeca-9,12-dienoyloxypropyl) 2-(trimethylazaniumyl)ethyl phosphate                                           | [M+HCOO]-      | Lipids and lipid-like molecules         |
| 781 | 10.463 | 427.2087 | 3-[5-Hydroxy-7-methoxy-2,3-dimethyl-6-(3-methylbut-2-enyl)-4-oxo-2,3-dihydrochromen-8-yl]hexanoic acid                       | [M+Na]+        | Organoheterocyclic compounds            |
| 782 | 10.467 | 299.2    | Dehydroabietic acid                                                                                                          | [M-H]-         | Lipids and lipid-like molecules         |
| 783 | 10.521 | 271.2291 | FA 16:0;2O                                                                                                                   | [M-H]-         | Lipids and lipid-like molecules         |

|     |        |          |                                                                                                                    |            |                                         |
|-----|--------|----------|--------------------------------------------------------------------------------------------------------------------|------------|-----------------------------------------|
| 784 | 10.529 | 311.2189 | (9Z,15Z)-12,13-Dihydroxyoctadeca-9,15-dienoate                                                                     | [M-H]-     | Lipids and lipid-like molecules         |
| 785 | 10.545 | 585.3526 | Dehydroxynocardamine                                                                                               | [M+H]+     | Phenylpropanoids and polyketides        |
| 786 | 10.551 | 415.2809 | Deoxycholic acid                                                                                                   | [M+Na]+    | Lipids and lipid-like molecules         |
| 787 | 10.554 | 279.2328 | Linoleic acid                                                                                                      | [M-H]-     | Lipids and lipid-like molecules         |
| 788 | 10.579 | 467.294  | Cephaeline                                                                                                         | [M+H]+     | Alkaloids and derivatives               |
| 789 | 10.579 | 745.4093 | Naadp                                                                                                              | [M]+       | Nucleosides, nucleotides, and analogues |
| 790 | 10.579 | 540.3308 | 1-Palmitoylphosphatidylcholine                                                                                     | [M+HCOO]-  | Lipids and lipid-like molecules         |
| 791 | 10.582 | 295.2617 | Methyl linoleate                                                                                                   | [M+H]+     | Undefined                               |
| 792 | 10.587 | 496.3401 | 1-Hexadecanoyl-sn-glycero-3-phosphocholine                                                                         | [M+H]+     | Lipids and lipid-like molecules         |
| 793 | 10.682 | 297.2418 | 9,10-Epoxy stearic acid                                                                                            | [M-H]-     | Lipids and lipid-like molecules         |
| 794 | 10.735 | 478.2918 | 2-Azaniumylethyl (2-hydroxy-3-octadec-9-enoyloxypropyl) phosphate                                                  | [M-H]-     | Lipids and lipid-like molecules         |
| 795 | 10.736 | 285.2434 | Luteolin                                                                                                           | [M-H]-     | Phenylpropanoids and polyketides        |
| 796 | 10.737 | 480.31   | Phosphatidylcholine lyso 16:0                                                                                      | [M-CH3]-   | Lipids and lipid-like molecules         |
| 797 | 10.745 | 518.3213 | (2-Hydroxy-3-octadeca-6,9,12-trienoyloxypropyl) 2-(trimethylazaniumyl)ethyl phosphate                              | [M+H]+     | Lipids and lipid-like molecules         |
| 798 | 10.754 | 452.2802 | 2-Azaniumylethyl (3-hexadecanoyloxy-2-hydroxypropyl) phosphate                                                     | [M-H]-     | Lipids and lipid-like molecules         |
| 799 | 10.761 | 454.2915 | 1-Hexadecanoyl-sn-glycero-3-phosphoethanolamine                                                                    | [M+H]+     | Lipids and lipid-like molecules         |
| 800 | 10.772 | 293.1774 | Hydron;tetradecyl sulfate                                                                                          | [M-H]-     | Organic acids and derivatives           |
| 801 | 10.774 | 355.2837 | [4,6-diethyl-6-(4-ethyl-2-methyloctyl)-3H-1,2-dioxin-3-yl]acetic acid                                              | [M+H]+     | Undefined                               |
| 802 | 10.781 | 297.1506 | 4-(Decan-4-yl)benzenesulfonic acid                                                                                 | [M-H]-     | Benzenoids                              |
| 803 | 10.789 | 432.2075 | Guan-fu base Y                                                                                                     | [M+FA-H]-  | Undefined                               |
| 804 | 10.794 | 519.2573 | Genistein 7-O-beta-d-glucoside-6"-O-malonate                                                                       | [M+H]+     | Phenylpropanoids and polyketides        |
| 805 | 10.797 | 227.2017 | Myristic acid                                                                                                      | [M-H]-     | Lipids and lipid-like molecules         |
| 806 | 10.855 | 522.3554 | (2-Hydroxy-3-octadec-9-enoyloxypropyl) 2-(trimethylazaniumyl)ethyl phosphate                                       | [M+H]+     | Lipids and lipid-like molecules         |
| 807 | 10.855 | 506.3263 | Phosphatidylcholine lyso 18:1                                                                                      | [M-CH3]-   | Lipids and lipid-like molecules         |
| 808 | 10.87  | 381.2999 | Persin                                                                                                             | [M+H]+     | Undefined                               |
| 809 | 10.879 | 907.5356 | Chlorophyll b from Chlorella                                                                                       | [M]+       | Organoheterocyclic compounds            |
| 810 | 10.905 | 271.2054 | h_193_Quinolone_m                                                                                                  | [M-H2O+H]+ | Lipids and lipid-like molecules         |
| 811 | 10.915 | 349.2752 | 8-[5-(Acetyloxy)-3-methylpentyl]octahydro-4,4,8a-trimethyl-7-methylene-2(1H)-naphthalenone                         | [M+H]+     | Lipids and lipid-like molecules         |
| 812 | 10.916 | 400.3398 | (+)-Palmitoylcarnitine                                                                                             | [M+H]+     | Lipids and lipid-like molecules         |
| 813 | 10.925 | 281.2484 | Vaccenic acid                                                                                                      | [M-H]-     | Lipids and lipid-like molecules         |
| 814 | 10.95  | 510.3518 | 1-Heptadecanoyl-sn-glycero-3-phosphocholine                                                                        | [M+H]+     | Lipids and lipid-like molecules         |
| 815 | 10.95  | 349.2383 | 5-(5-Methoxycarbonyl-5,8a-dimethyl-2-methylidene-3,4,4a,6,7,8-hexahydro-1H-naphthalen-1-yl)-3-methylpentanoic acid | [M-H]-     | Lipids and lipid-like molecules         |

|     |        |          |                                                                                                                                                   |                                     |                                  |
|-----|--------|----------|---------------------------------------------------------------------------------------------------------------------------------------------------|-------------------------------------|----------------------------------|
| 816 | 10.963 | 256.2661 | Palmitic amide                                                                                                                                    | [M+H] <sup>+</sup>                  | Undefined                        |
| 817 | 10.964 | 301.2157 | Abietic acid                                                                                                                                      | [M-H] <sup>-</sup>                  | Lipids and lipid-like molecules  |
| 818 | 10.995 | 609.2681 | Tulipanin                                                                                                                                         | [M+H] <sup>+</sup>                  | Phenylpropanoids and polyketides |
| 819 | 11.008 | 241.216  | Pentadecanoic acid                                                                                                                                | [M-H] <sup>-</sup>                  | Lipids and lipid-like molecules  |
| 820 | 11.013 | 838.6406 | Isobutyryl CoA                                                                                                                                    | [M+H] <sup>+</sup>                  | Lipids and lipid-like molecules  |
| 821 | 11.019 | 313.2709 | 2,4-Dihydroxyheptadecyl acetate                                                                                                                   | [M-H <sub>2</sub> O+H] <sup>+</sup> | Lipids and lipid-like molecules  |
| 822 | 11.02  | 427.3005 | Acetyl-Leu-Leu-Arg-al                                                                                                                             | [M+H] <sup>+</sup>                  | Organic acids and derivatives    |
| 823 | 11.027 | 331.2808 | 2-Palmitoylglycerol                                                                                                                               | [M+H] <sup>+</sup>                  | Lipids and lipid-like molecules  |
| 824 | 11.038 | 275.1978 | Nandrolone                                                                                                                                        | [M+H] <sup>+</sup>                  | Lipids and lipid-like molecules  |
| 825 | 11.066 | 345.2034 | 1,3,4,9,10,10a-Hexahydro-5,6-dihydroxy-1,1-dimethyl-7-(1-methylethyl)-, methyl ester, (4aR)-4a(2H)-phenanthrenecarboxylic acid                    | [M-H] <sup>-</sup>                  | Lipids and lipid-like molecules  |
| 826 | 11.067 | 345.2429 | Ginkgolic Acid C15:1                                                                                                                              | [M-H] <sup>-</sup>                  | Undefined                        |
| 827 | 11.075 | 845.4692 | Ginsenoside-Rg1                                                                                                                                   | [M+FA-H] <sup>-</sup>               | Undefined                        |
| 828 | 11.091 | 304.2611 | Fenpropimorph                                                                                                                                     | [M+H] <sup>+</sup>                  | Benzenoids                       |
| 829 | 11.092 | 404.3119 | 2-(14-Methylpentadecanoylamino)-3-phenylpropanoic acid                                                                                            | [M+H] <sup>+</sup>                  | Organic acids and derivatives    |
| 830 | 11.093 | 311.1486 | beta-D-Glucopyranoside, 5-methyl-2-(1-methylethyl)phenyl                                                                                          | [M-H] <sup>-</sup>                  | Lipids and lipid-like molecules  |
| 831 | 11.098 | 579.5297 | Procyanidin B2                                                                                                                                    | [M+H] <sup>+</sup>                  | Phenylpropanoids and polyketides |
| 832 | 11.101 | 223.2047 | cis-Nerolidol                                                                                                                                     | [M+H] <sup>+</sup>                  | Lipids and lipid-like molecules  |
| 833 | 11.109 | 283.2642 | Methyl heptadecanoate                                                                                                                             | [M-H] <sup>-</sup>                  | Lipids and lipid-like molecules  |
| 834 | 11.119 | 315.251  | Methyl hexadecanoate                                                                                                                              | [M-H] <sup>-</sup>                  | Undefined                        |
| 835 | 11.123 | 309.1724 | 2-Dodecoxyethyl hydrogen sulfate                                                                                                                  | [M-H] <sup>-</sup>                  | Organic acids and derivatives    |
| 836 | 11.123 | 265.1464 | Lauryl sulfate                                                                                                                                    | [M-H] <sup>-</sup>                  | Organic acids and derivatives    |
| 837 | 11.124 | 311.1681 | 5-(4-Sulfophenyl)undecane                                                                                                                         | [M-H] <sup>-</sup>                  | Benzenoids                       |
| 838 | 11.128 | 529.3046 | Kukoamine B                                                                                                                                       | [M-H] <sup>-</sup>                  | Undefined                        |
| 839 | 11.139 | 609.2679 | Reserpine                                                                                                                                         | [M+H] <sup>+</sup>                  | Alkaloids and derivatives        |
| 840 | 11.151 | 255.2323 | Palmitic acid                                                                                                                                     | [M-H] <sup>-</sup>                  | Lipids and lipid-like molecules  |
| 841 | 11.182 | 777.4218 | Heterophyllin B                                                                                                                                   | [M-H] <sup>-</sup>                  | Undefined                        |
| 842 | 11.187 | 463.2813 | Pristimerin                                                                                                                                       | [M-H] <sup>-</sup>                  | Lipids and lipid-like molecules  |
| 843 | 11.193 | 611.4613 | (S)-7-(((2-O-6-Deoxy-alpha-L-mannopyranosyl)-beta-D-glucopyranosyl)oxy)-2,3-dihydro-5-hydroxy-2-(3-hydroxy-4-methoxyphenyl)-4H-1-benzopyran-4-one | [M+H] <sup>+</sup>                  | Phenylpropanoids and polyketides |
| 844 | 11.196 | 551.2595 | Chaetoglobosin A                                                                                                                                  | [M+Na] <sup>+</sup>                 | Alkaloids and derivatives        |
| 845 | 11.212 | 705.3981 | Atazanavir                                                                                                                                        | [M+H] <sup>+</sup>                  | Organic acids and derivatives    |
| 846 | 11.213 | 513.3505 | Alisol A                                                                                                                                          | [M+H] <sup>+</sup>                  | Lipids and lipid-like molecules  |
| 847 | 11.217 | 232.168  | alpha-Pyrrolidinovalerophenone                                                                                                                    | [M+H] <sup>+</sup>                  | Organic oxygen compounds         |
| 848 | 11.234 | 357.2967 | Glyceryl monooleate                                                                                                                               | [M+H] <sup>+</sup>                  | Lipids and lipid-like molecules  |
| 849 | 11.246 | 295.2229 | 9-Oxoctadeca-10,12-dienoic acid                                                                                                                   | [M+H] <sup>+</sup>                  | Lipids and lipid-like molecules  |

|     |        |          |                                                                                                                                                    |                         |                                 |
|-----|--------|----------|----------------------------------------------------------------------------------------------------------------------------------------------------|-------------------------|---------------------------------|
| 850 | 11.246 | 73.06405 | Butyraldehyde                                                                                                                                      | [M+Li]+                 | Organic oxygen compounds        |
| 851 | 11.256 | 394.3309 | N-Oleoyl leucine                                                                                                                                   | [M-H]-                  | Organic acids and derivatives   |
| 852 | 11.289 | 184.0722 | Phosphocholine                                                                                                                                     | [M]+                    | Organic nitrogen compounds      |
| 853 | 11.3   | 250.1771 | N-Desmethyltramadol                                                                                                                                | [M+H]+                  | Benzenoids                      |
| 854 | 11.3   | 264.1543 | (2E,4E)-N-(1,3-Dihydroxy-3-methylpentan-2-yl)-2-methylhexa-2,4-dienamide                                                                           | [M+Na]+                 | Lipids and lipid-like molecules |
| 855 | 11.314 | 524.3715 | 1-Stearoyl-sn-glycero-3-phosphocholine                                                                                                             | [M+H]+                  | Lipids and lipid-like molecules |
| 856 | 11.345 | 305.2469 | FA 20:3                                                                                                                                            | [M-H]-                  | Lipids and lipid-like molecules |
| 857 | 11.407 | 253.2158 | Palmitoleic acid                                                                                                                                   | [M-H]-                  | Lipids and lipid-like molecules |
| 858 | 11.413 | 295.2257 | FA 18:2;O                                                                                                                                          | [M-H]-                  | Lipids and lipid-like molecules |
| 859 | 11.418 | 311.2355 | 3-(10-Phenyldecyl)Phenol                                                                                                                           | [M+H]+                  | Undefined                       |
| 860 | 11.424 | 293.2462 | 14-(Hydroxymethyl)-5,9-dimethyltetracyclo[11.2.1.0~1,10~.0~4,9~]hexadecan-5-ol                                                                     | [M+H]+                  | Lipids and lipid-like molecules |
| 861 | 11.465 | 541.3862 | 18-Deoxyeucopaxillone A                                                                                                                            | [M+H-H <sub>2</sub> O]+ | Undefined                       |
| 862 | 11.498 | 563.5032 | 2-Oahsa                                                                                                                                            | [M-H]-                  | Lipids and lipid-like molecules |
| 863 | 11.499 | 281.2506 | trans-Vaccenic acid                                                                                                                                | [M-H]-                  | Lipids and lipid-like molecules |
| 864 | 11.528 | 789.4617 | Ginsenoside Rk1                                                                                                                                    | [M+H]+                  | Undefined                       |
| 865 | 11.533 | 284.296  | Octadecanamide                                                                                                                                     | [M+H]+                  | Organic acids and derivatives   |
| 866 | 11.576 | 269.2492 | Heptadecanoic acid                                                                                                                                 | [M-H]-                  | Lipids and lipid-like molecules |
| 867 | 11.597 | 313.2688 | Glyceryl palmitate                                                                                                                                 | [M-H <sub>2</sub> O+H]+ | Lipids and lipid-like molecules |
| 868 | 11.601 | 332.2918 | 5-[(1S,4aS,8aS)-Decahydro-5,5,8a-trimethyl-2-methylene-1-naphthalenyl]-3-methyl-, (2E)-2-penten-1-ol                                               | [M+ACN+H]+              | Lipids and lipid-like molecules |
| 869 | 11.605 | 293.2825 | (2R)-1-(5-Hydroxy-3-methylpentyl)-2,5,5,8a-tetramethyldecahydro-2-naphthalenol                                                                     | [M-H <sub>2</sub> O+H]+ | Lipids and lipid-like molecules |
| 870 | 11.619 | 803.5429 | (22E)-3alpha,12alpha-Dihydroxy-5beta-chol-22-en-24-oic Acid                                                                                        | [2M+Na]+                | Lipids and lipid-like molecules |
| 871 | 11.629 | 307.2608 | Linolenic acid ethyl ester                                                                                                                         | [M+H]+                  | Undefined                       |
| 872 | 11.629 | 327.2884 | FA 20:0;2O                                                                                                                                         | [M-H]-                  | Lipids and lipid-like molecules |
| 873 | 11.64  | 715.3841 | [(2R,3R,4S,5S,6R)-3-Acetyloxy-2-(acetyloxymethyl)-5-hexanoyloxy-6-[(2S,3R)-2,3,4-trihydroxybutoxy]oxan-4-yl] 14-hydroxytetradecanoate              | [M+Na]+                 | Lipids and lipid-like molecules |
| 874 | 11.644 | 307.2632 | FA 20:2                                                                                                                                            | [M-H]-                  | Lipids and lipid-like molecules |
| 875 | 11.658 | 283.2644 | Stearic acid                                                                                                                                       | [M-H]-                  | Lipids and lipid-like molecules |
| 876 | 11.662 | 359.3142 | Glyceryl monostearate                                                                                                                              | [M+H]+                  | Lipids and lipid-like molecules |
| 877 | 11.671 | 295.2641 | FA 19:1                                                                                                                                            | [M-H]-                  | Lipids and lipid-like molecules |
| 878 | 11.675 | 529.382  | 16-hydroxy-2,2,4a,6a,6b,11,11,14b-octamethyl-4H,4bH,5H,6H,7H,8H,9H,10H,12H,12aH,14H,14aH,15H,16H,16aH-piceno[3,4-d][1,3]dioxine-8a-carboxylic acid | [M+H]+                  | Undefined                       |
| 879 | 11.678 | 501.3167 | Medicagenic acid                                                                                                                                   | [M-H]-                  | Lipids and lipid-like molecules |

|     |        |          |                                                                                                                                                                                                            |                                     |                                  |
|-----|--------|----------|------------------------------------------------------------------------------------------------------------------------------------------------------------------------------------------------------------|-------------------------------------|----------------------------------|
| 880 | 11.692 | 583.3944 | Diacetylpyxinol                                                                                                                                                                                            | [M+Na] <sup>+</sup>                 | Lipids and lipid-like molecules  |
| 881 | 11.794 | 551.4219 | Echinenone                                                                                                                                                                                                 | [M+H] <sup>+</sup>                  | Lipids and lipid-like molecules  |
| 882 | 11.799 | 326.233  | 3-Hydroxy-N-(2-oxoxolan-3-yl)tetradecanamide                                                                                                                                                               | [M-H] <sup>-</sup>                  | Organic acids and derivatives    |
| 883 | 11.865 | 779.4506 | Saikosaponin a                                                                                                                                                                                             | [M-H] <sup>-</sup>                  | Undefined                        |
| 884 | 11.892 | 683.4287 | Ginsenoside Rh1                                                                                                                                                                                            | [M+FA-H] <sup>-</sup>               | Undefined                        |
| 885 | 11.912 | 107.0471 | Benzaldehyde                                                                                                                                                                                               | [M+H] <sup>+</sup>                  | Benzenoids                       |
| 886 | 11.92  | 613.4742 | L-Glutathione (oxidized form)                                                                                                                                                                              | [M+H] <sup>+</sup>                  | Organic acids and derivatives    |
| 887 | 11.921 | 299.2585 | (R)-2-Hydroxystearic acid                                                                                                                                                                                  | [M-H] <sup>-</sup>                  | Undefined                        |
| 888 | 11.922 | 783.4782 | Ginsenoside Rg2                                                                                                                                                                                            | [M-H] <sup>-</sup>                  | Undefined                        |
| 889 | 11.945 | 679.5057 | Avocadene 1-acetate                                                                                                                                                                                        | [2M+Na] <sup>+</sup>                | Lipids and lipid-like molecules  |
| 890 | 11.961 | 573.4817 | 3-{7-[5-(1-hydroxyhenicosa-4,8-dien-1-yl)oxolan-2-yl]heptyl}-5-methyl-5H-furan-2-one                                                                                                                       | [M+H] <sup>+</sup>                  | Undefined                        |
| 891 | 11.979 | 734.4785 | Erythromycin                                                                                                                                                                                               | [M-H] <sup>-</sup>                  | Organic oxygen compounds         |
| 892 | 11.985 | 309.28   | trans-11-Eicosenoic acid                                                                                                                                                                                   | [M-H] <sup>-</sup>                  | Lipids and lipid-like molecules  |
| 893 | 11.997 | 401.3371 | 7-Ketocholesterol                                                                                                                                                                                          | [M+H] <sup>+</sup>                  | Lipids and lipid-like molecules  |
| 894 | 11.999 | 835.5231 | PI 34:1                                                                                                                                                                                                    | [M-H] <sup>-</sup>                  | Undefined                        |
| 895 | 12.026 | 457.3674 | alpha-Boswellic acid                                                                                                                                                                                       | [M+H] <sup>+</sup>                  | Lipids and lipid-like molecules  |
| 896 | 12.03  | 535.2726 | 3-Deoxo-3-beta-Acetoxydeoxydihydrogedunin                                                                                                                                                                  | [M+Na] <sup>+</sup>                 | Organoheterocyclic compounds     |
| 897 | 12.032 | 533.2481 | 2-[(2R,4As,8S,8aS)-8-[2-[(4aS,7R,8aR)-7-(1-carboxyethenyl)-1-hydroxy-4a-methyl-2-oxo-6,7,8,8a-tetrahydro-5H-naphthalen-1-yl]ethyl]-4a-methyl-7-oxo-1,2,3,4,8,8a-hexahydronaphthalen-2-yl]prop-2-enoic acid | [M+Na] <sup>+</sup>                 | Lipids and lipid-like molecules  |
| 898 | 12.036 | 497.3585 | Bryodulcosigenin                                                                                                                                                                                           | [M+Na] <sup>+</sup>                 | Lipids and lipid-like molecules  |
| 899 | 12.065 | 409.4026 | FA 27:0                                                                                                                                                                                                    | [M-H] <sup>-</sup>                  | Lipids and lipid-like molecules  |
| 900 | 12.07  | 297.2786 | FA 19:0                                                                                                                                                                                                    | [M-H] <sup>-</sup>                  | Lipids and lipid-like molecules  |
| 901 | 12.078 | 355.3202 | 2-Hydroxydocosanoic acid                                                                                                                                                                                   | [M-H] <sup>-</sup>                  | Lipids and lipid-like molecules  |
| 902 | 12.079 | 391.2794 | Diocetyl phthalate                                                                                                                                                                                         | [M+H] <sup>+</sup>                  | Benzenoids                       |
| 903 | 12.079 | 360.3236 | N-(2-Phenylethyl)hexadecanamide                                                                                                                                                                            | [M+H] <sup>+</sup>                  | Lipids and lipid-like molecules  |
| 904 | 12.085 | 589.4777 | 3-[12-hydroxy-12-[5'-(1-hydroxydodecyl)-[2,2'-bioxolan]-5-yl]dodecyl]-5-methyl-5H-furan-2-one                                                                                                              | [M+H-H <sub>2</sub> O] <sup>+</sup> | Undefined                        |
| 905 | 12.089 | 263.2337 | 5-dodecyl-4-hydroxy-4-methylcyclopent-2-en-1-one                                                                                                                                                           | [M+H-H <sub>2</sub> O] <sup>+</sup> | Undefined                        |
| 906 | 12.212 | 471.3417 | Enoxolone                                                                                                                                                                                                  | [M+H] <sup>+</sup>                  | Lipids and lipid-like molecules  |
| 907 | 12.237 | 431.1773 | Bidwillon A                                                                                                                                                                                                | [M+Na] <sup>+</sup>                 | Phenylpropanoids and polyketides |
| 908 | 12.276 | 485.3582 | Glycyrrhetic acid, Me ester                                                                                                                                                                                | [M+H] <sup>+</sup>                  | Undefined                        |
| 909 | 12.279 | 445.3647 | Topsentisterol A2                                                                                                                                                                                          | [M+H] <sup>+</sup>                  | Undefined                        |
| 910 | 12.285 | 415.3558 | 2,3-dimethyl-5-(3,7,11,15-tetramethylhexadec-2-en-1-yl)cyclohexa-2,5-diene-1,4-dione                                                                                                                       | [M+H] <sup>+</sup>                  | Undefined                        |

|     |        |          |                                                                                                                     |            |                                 |
|-----|--------|----------|---------------------------------------------------------------------------------------------------------------------|------------|---------------------------------|
| 911 | 12.307 | 369.3357 | FA 23:0;2O                                                                                                          | [M-H]-     | Lipids and lipid-like molecules |
| 912 | 12.4   | 195.121  | Hexylresorcinol                                                                                                     | [M+H]+     | Benzenoids                      |
| 913 | 12.409 | 405.2603 | 6,7-Diketolithocholic acid                                                                                          | [M+H]+     | Lipids and lipid-like molecules |
| 914 | 12.434 | 306.2764 | Cyclic cmp                                                                                                          | [M+H]+     | Organic oxygen compounds        |
| 915 | 12.46  | 333.2387 | (3R,4R,5R)-3-[(11E)-11,15-Hexadecadien-9-yn-1-yl]-4-hydroxy-5-methyldihydro-2(3H)-furanone                          | [M+H]+     | Organoheterocyclic compounds    |
| 916 | 12.464 | 855.4994 | PI 36:5                                                                                                             | [M-H]-     | Undefined                       |
| 917 | 12.482 | 959.5378 | Soyasaponin Ba                                                                                                      | [M+H]+     | Lipids and lipid-like molecules |
| 918 | 12.485 | 738.5043 | PE 36:4                                                                                                             | [M-H]-     | Undefined                       |
| 919 | 12.552 | 383.3518 | FA 24:0;2O                                                                                                          | [M-H]-     | Lipids and lipid-like molecules |
| 920 | 12.569 | 165.089  | Phenethyl acetate                                                                                                   | [M+H]+     | Benzenoids                      |
| 921 | 12.57  | 429.3727 | 13'-Hydroxy-alpha-tocopherol                                                                                        | [M+H-H2O]+ | Undefined                       |
| 922 | 12.628 | 815.4758 | Ginsenoside F3                                                                                                      | [M+FA-H]-  | Undefined                       |
| 923 | 12.67  | 325.3107 | Heneicosanoic acid                                                                                                  | [M-H]-     | Lipids and lipid-like molecules |
| 924 | 12.675 | 383.3666 | Campesterol                                                                                                         | [M+H-H2O]+ | Lipids and lipid-like molecules |
| 925 | 12.73  | 945.5363 | Ginsenoside Re                                                                                                      | [M-H]-     | Undefined                       |
| 926 | 12.731 | 363.2165 | CORTISOL                                                                                                            | [M+H]+     | Undefined                       |
| 927 | 12.755 | 559.3099 | [2-Hydroxy-3-[3,4,5-trihydroxy-6-(hydroxymethyl)oxan-2-yl]oxypropyl]octadeca-9,12,15-trienoate                      | [M+HCOO]-  | Lipids and lipid-like molecules |
| 928 | 12.835 | 769.5025 | PG 36:4                                                                                                             | [M-H]-     | Undefined                       |
| 929 | 12.906 | 893.5522 | Chlorophyll a from Chlorella                                                                                        | [M]+       | Organoheterocyclic compounds    |
| 930 | 12.919 | 415.2211 | 7-Hydroxymitragynine                                                                                                | [M+H]+     | Alkaloids and derivatives       |
| 931 | 12.921 | 863.4926 | {6-[2-(hexadecanoyloxy)-3-(icosa-5,8,11,14,17-pentaenoyloxy)propoxy]-3,4,5-trihydroxyoxan-2-yl}methanesulfonic acid | [M+Na]+    | Undefined                       |
| 932 | 12.936 | 551.5006 | Methyl 18-(hexadecanoyloxy)octadec-9-enoate                                                                         | [M+H]+     | Undefined                       |
| 933 | 12.936 | 339.327  | Docosanoic acid                                                                                                     | [M-H]-     | Lipids and lipid-like molecules |
| 934 | 12.956 | 467.4098 | 2-Mahpda                                                                                                            | [M-H]-     | Lipids and lipid-like molecules |
| 935 | 12.983 | 365.3415 | Nervonic acid                                                                                                       | [M-H]-     | Lipids and lipid-like molecules |
| 936 | 13.007 | 833.5208 | PI 34:2                                                                                                             | [M-H]-     | Undefined                       |
| 937 | 13.034 | 423.4206 | Octacosanoic acid                                                                                                   | [M-H]-     | Lipids and lipid-like molecules |
| 938 | 13.049 | 723.5169 | [(2R)-2,3-Di(hexadecanoyloxy)propyl] 2,3-dihydroxypropyl phosphate                                                  | [M+H]+     | Lipids and lipid-like molecules |
| 939 | 13.059 | 411.3829 | FA 26:0;2O                                                                                                          | [M-H]-     | Lipids and lipid-like molecules |
| 940 | 13.075 | 612.5556 | 1-Palmitoyl-2-oleoyl-rac-glycerol                                                                                   | [M+NH4]+   | Lipids and lipid-like molecules |
| 941 | 13.086 | 745.5049 | PG 34:2                                                                                                             | [M-H]-     | Undefined                       |
| 942 | 13.133 | 395.3645 | Fucosterol                                                                                                          | [M+H-H2O]+ | Lipids and lipid-like molecules |

|     |        |          |                                                                                                                                                                             |                                     |                                  |
|-----|--------|----------|-----------------------------------------------------------------------------------------------------------------------------------------------------------------------------|-------------------------------------|----------------------------------|
| 943 | 13.155 | 683.5244 | 3-{1,10-dihydroxy-10-methyl-3-[2-methyl-4-(2,5,6,6-tetramethylcyclohex-1-en-1-yl)buta-1,3-dien-1-yl]-7-(1-oxopropan-2-ylidene)-2-oxaspiro[4.5]decan-6-yl}propyl dodecanoate | [M+H] <sup>+</sup>                  | Undefined                        |
| 944 | 13.16  | 847.5347 | PI 35:2                                                                                                                                                                     | [M-H] <sup>-</sup>                  | Undefined                        |
| 945 | 13.185 | 719.4848 | PG 32:1                                                                                                                                                                     | [M-H] <sup>-</sup>                  | Undefined                        |
| 946 | 13.191 | 1019.502 | Madecassoside                                                                                                                                                               | [M+FA-H] <sup>-</sup>               | Undefined                        |
| 947 | 13.205 | 259.2029 | Octadeca-2,4,9-trien-6-yne-1,18-diol                                                                                                                                        | [M+H-H <sub>2</sub> O] <sup>+</sup> | Undefined                        |
| 948 | 13.242 | 712.4929 | PE 34:3                                                                                                                                                                     | [M-H] <sup>-</sup>                  | Undefined                        |
| 949 | 13.243 | 740.523  | PE 36:3                                                                                                                                                                     | [M-H] <sup>-</sup>                  | Undefined                        |
| 950 | 13.283 | 765.4642 | Ginsenoside Rg5                                                                                                                                                             | [M-H] <sup>-</sup>                  | Undefined                        |
| 951 | 13.33  | 285.2411 | 2,3-Dihydroxypropyl tetradecanoate                                                                                                                                          | [M-H <sub>2</sub> O+H] <sup>+</sup> | Lipids and lipid-like molecules  |
| 952 | 13.364 | 277.2149 | gamma-Linolenic acid                                                                                                                                                        | [M-H] <sup>-</sup>                  | Lipids and lipid-like molecules  |
| 953 | 13.384 | 338.3393 | Erucamide                                                                                                                                                                   | [M+H] <sup>+</sup>                  | Lipids and lipid-like molecules  |
| 954 | 13.393 | 399.3623 | Fecosterol                                                                                                                                                                  | [M+H] <sup>+</sup>                  | Undefined                        |
| 955 | 13.409 | 721.502  | Dipalmitoylphosphatidylglycerol                                                                                                                                             | [M-H] <sup>-</sup>                  | Lipids and lipid-like molecules  |
| 956 | 13.465 | 747.5156 | PG 34:1                                                                                                                                                                     | [M-H] <sup>-</sup>                  | Undefined                        |
| 957 | 13.507 | 367.3564 | Tetracosanoic acid                                                                                                                                                          | [M-H] <sup>-</sup>                  | Lipids and lipid-like molecules  |
| 958 | 13.542 | 861.5491 | gamma-Aminobutyrate                                                                                                                                                         | [M-H <sub>2</sub> O-H] <sup>-</sup> | Organic acids and derivatives    |
| 959 | 13.549 | 545.4189 | 12-Desoxydiacetylpyxinol                                                                                                                                                    | [M+H] <sup>+</sup>                  | Lipids and lipid-like molecules  |
| 960 | 13.55  | 337.2721 | 12,19,20-Trihydroxy-14-methylenegeranylnol                                                                                                                                  | [M+H-H <sub>2</sub> O] <sup>+</sup> | Undefined                        |
| 961 | 13.554 | 393.3732 | FA 26:1                                                                                                                                                                     | [M-H] <sup>-</sup>                  | Lipids and lipid-like molecules  |
| 962 | 13.584 | 742.5376 | PE 36:2                                                                                                                                                                     | [M-H] <sup>-</sup>                  | Undefined                        |
| 963 | 13.586 | 430.3789 | Vitamin E                                                                                                                                                                   | [M] <sup>+</sup>                    | Lipids and lipid-like molecules  |
| 964 | 13.587 | 647.4634 | 1,2-Dipalmitoyl-sn-glycerol 3-phosphate                                                                                                                                     | [M-H] <sup>-</sup>                  | Lipids and lipid-like molecules  |
| 965 | 13.59  | 714.5087 | PE 34:2                                                                                                                                                                     | [M-H] <sup>-</sup>                  | Undefined                        |
| 966 | 13.659 | 413.3749 | Stigmasterol                                                                                                                                                                | [M+H] <sup>+</sup>                  | Lipids and lipid-like molecules  |
| 967 | 13.662 | 395.3625 | alpha-Spinasterol                                                                                                                                                           | [M+H-H <sub>2</sub> O] <sup>+</sup> | Lipids and lipid-like molecules  |
| 968 | 13.688 | 403.2465 | Telocinobufagin                                                                                                                                                             | [M+H] <sup>+</sup>                  | Undefined                        |
| 969 | 13.716 | 363.2888 | 2-Methoxy-4-pentadecylbenzoic acid                                                                                                                                          | [M+H] <sup>+</sup>                  | Benzenoids                       |
| 970 | 13.734 | 381.3702 | Pentacosanoic acid                                                                                                                                                          | [M-H] <sup>-</sup>                  | Lipids and lipid-like molecules  |
| 971 | 13.756 | 547.4684 | 3-{7-[5-(1-hydroxynonadec-4-en-1-yl)oxolan-2-yl]heptyl}-5-methyl-5H-furan-2-one                                                                                             | [M+H] <sup>+</sup>                  | Undefined                        |
| 972 | 13.783 | 728.5223 | PE 35:2                                                                                                                                                                     | [M-H] <sup>-</sup>                  | Undefined                        |
| 973 | 13.803 | 184.0708 | Phosphorylcholine                                                                                                                                                           | [M+H] <sup>+</sup>                  | Organic nitrogen compounds       |
| 974 | 13.88  | 933.574  | Petunidin-3-O-(6''-O-(4'''-O-E-coum)-alpha-rhamnopyranosyl-beta-glucopyranosyl)-5-O-beta-glucopyranoside                                                                    | [M+H] <sup>+</sup>                  | Phenylpropanoids and polyketides |

|     |        |          |                                                                                                                 |        |                                 |
|-----|--------|----------|-----------------------------------------------------------------------------------------------------------------|--------|---------------------------------|
| 975 | 13.919 | 581.5256 | FA 40:5                                                                                                         | [M-H]- | Lipids and lipid-like molecules |
| 976 | 13.96  | 397.3806 | 6-{9a,11a-dimethyl-1H,2H,3H,3aH,3bH,4H,8H,9H,9bH,10H,11H-cyclopenta[a]phenanthren-1-yl}-3-ethyl-2-methylheptane | [M+H]+ | Undefined                       |
| 977 | 14.059 | 150.1116 | Triethanolamine                                                                                                 | [M+H]+ | Organic nitrogen compounds      |
